# Supplementary material for: Enantio- and regioselective asymmetric allylic substitution using a chiral aminophosphinite ruthenium complex: an experimental and theoretical investigation
Source: Royal Society of Chemistry journal article supplement (doi:10.1039/d1ra06824e), 2021-01-01
Supplement: d1ra06824e1.pdf [file d1ra06824e1.pdf]

Supporting information

**Enantio- and Regioselective Asymmetric Allylic Substitution by a Chiral Aminophosphinite Ruthenium Complex: An Experimental and Theoretical Investigation**

Rajesh K. Jena\*<sup>a</sup> and Dhiraj Das<sup>b, c</sup>

<sup>a</sup>Centre of Advanced Materials and Applications, Utkal University, Vani Vihar, BBSR- 751 004, India

<sup>b</sup>Department of Chemistry, Indian Institute of Technology, Kharagpur 721 302, India

<sup>c</sup>Department of Chemistry, University of Calcutta, Kolkata, India

[rajeshjena@utkaluniversity.ac.in](mailto:rajeshjena@utkaluniversity.ac.in)

**Table of contents**

| <b>Contents</b>                                                                                                  | <b>Page number</b> |
|------------------------------------------------------------------------------------------------------------------|--------------------|
| <sup>1</sup> H, <sup>31</sup> P NMR spectra, HRMS, IR and CD spectra of L and 1 (Fig S1 – S10).....              | 2-6                |
| <sup>1</sup> H and <sup>13</sup> C NMR spectra of <b>4a</b> to <b>4g</b> (Fig S11 – S24).....                    | 7-13               |
| <sup>1</sup> H and <sup>13</sup> C NMR spectra of <b>7a</b> to <b>7f</b> (Fig S25 – S36).....                    | 14-19              |
| HRMS of <b>4f</b> and <b>4g</b> (Fig S37 & S38).....                                                             | 20                 |
| In-situ <sup>1</sup> H & <sup>31</sup> P NMR spectra of the reaction solution (Fig S39 & S40).....               | 21                 |
| Chiral HPLC data of <b>4a</b> , <b>4b</b> , <b>4c</b> , <b>4d</b> , <b>4g</b> and <b>7a</b> (Fig S41 – S46)..... | 22-26              |
| Cartesian coordinates of all optimized geometries.....                                                           | 27                 |

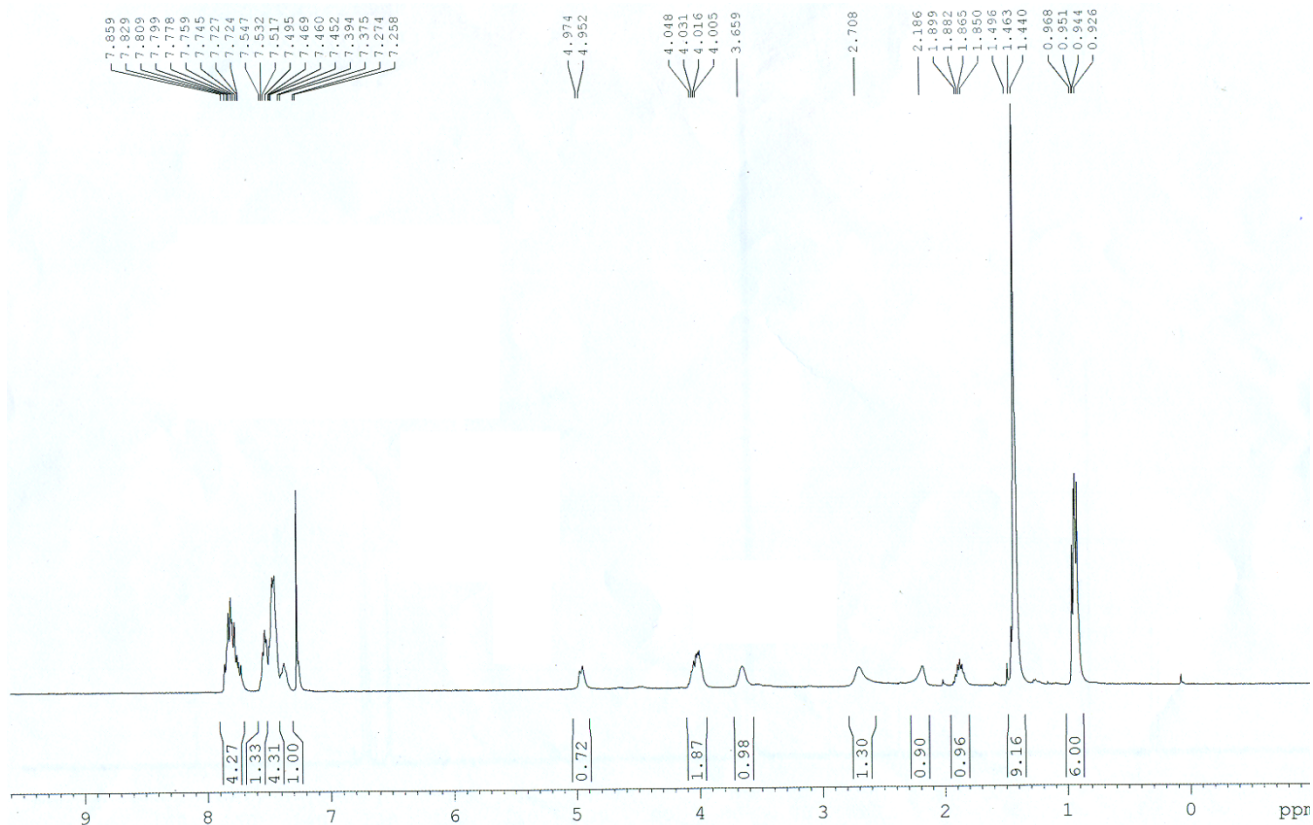

Figure S1  $^1\text{H}$  NMR (400 MHz) spectrum of L in  $\text{CDCl}_3$

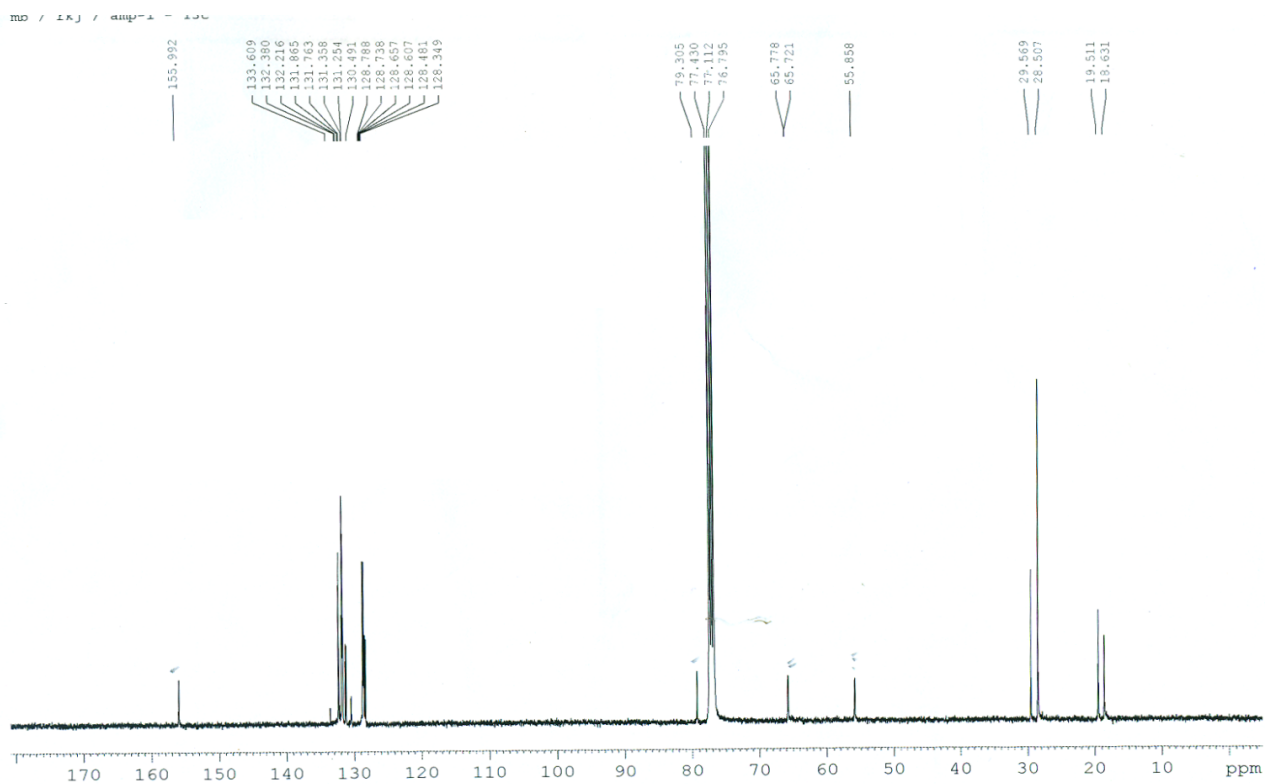

Figure S2  $^{13}\text{C}$  NMR (100 MHz) spectrum of L in  $\text{CDCl}_3$

mb / rkj / a - 31p

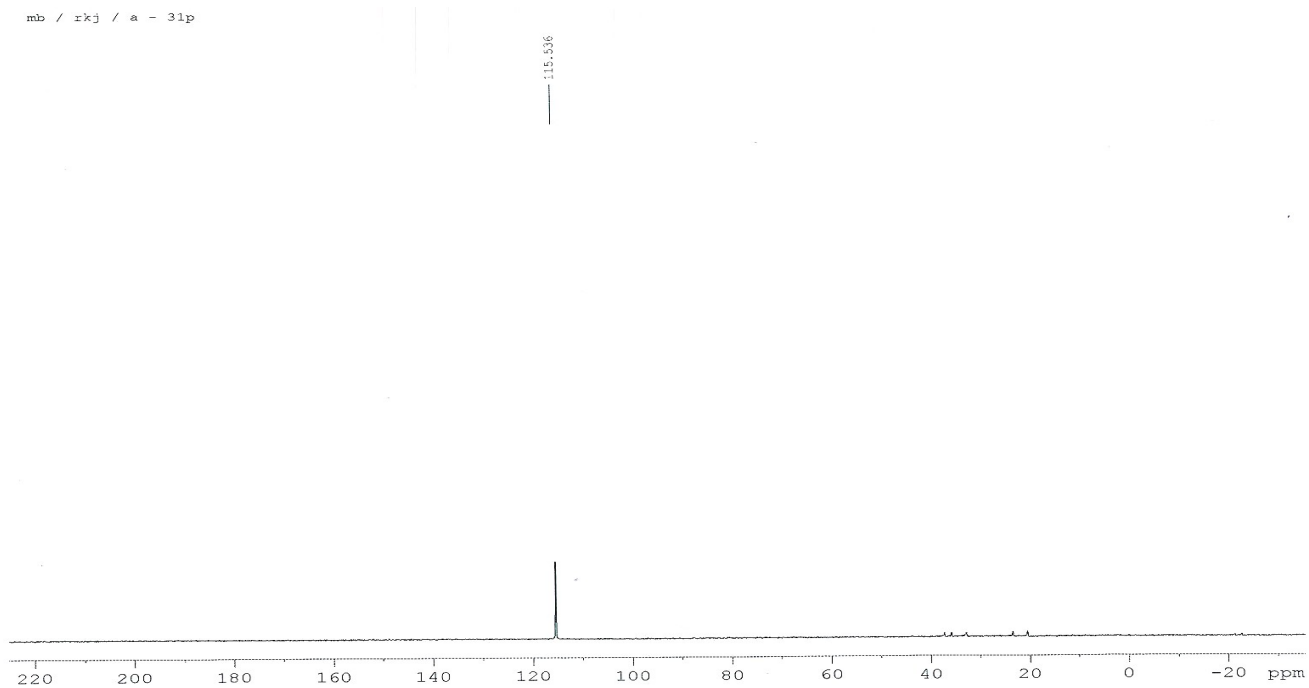

Figure S3  $^{31}\text{P}$  NMR (161.98 MHz) spectrum of L

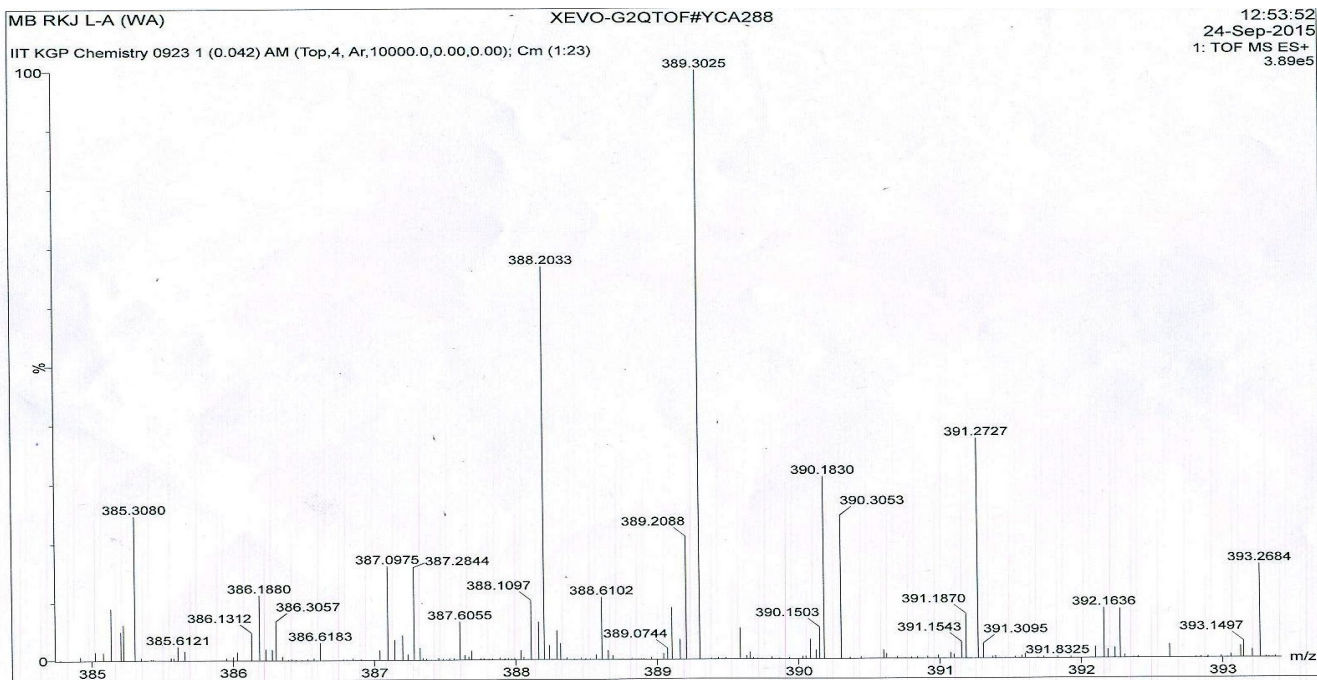

Figure S4 HRMS of L

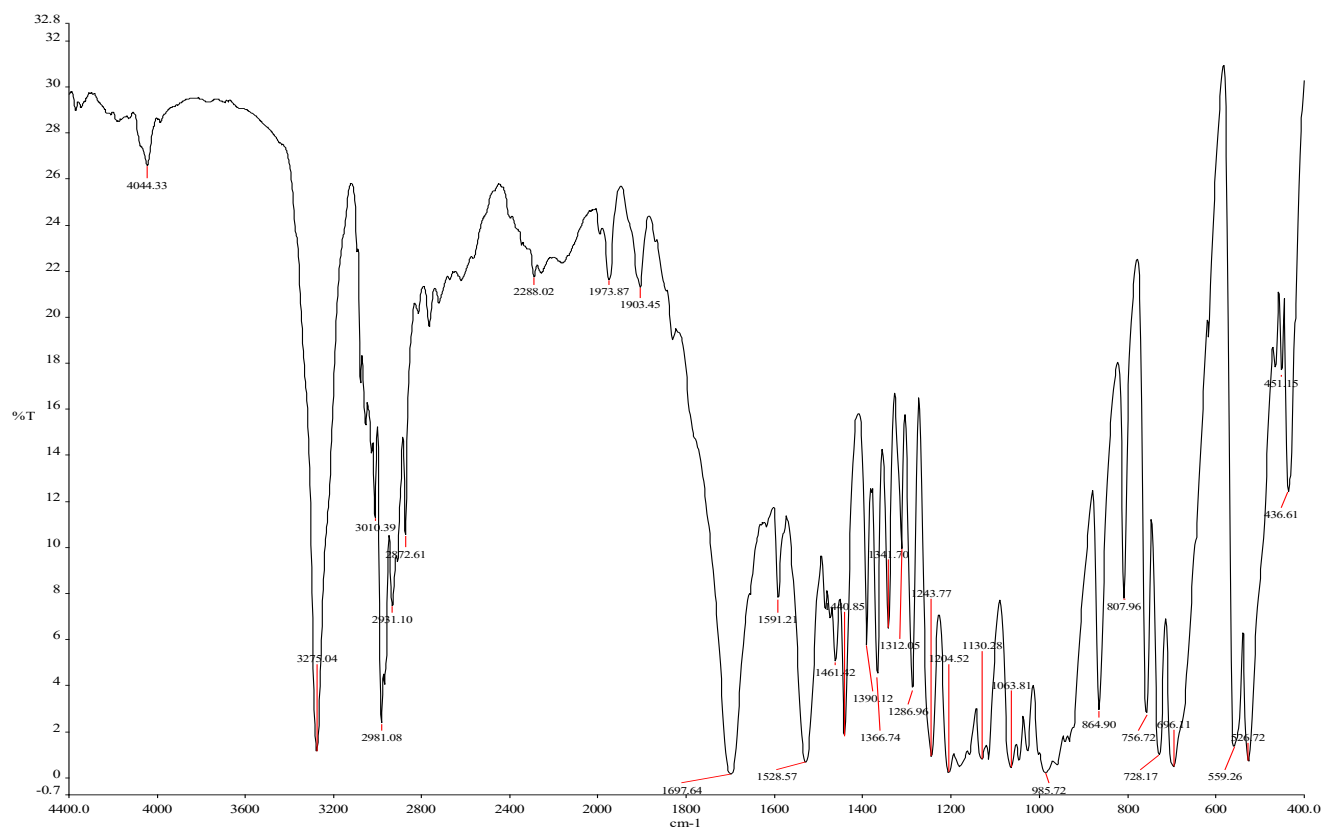

Figure S5 FT-IR spectrum of L

ab / rkj / compl-1h

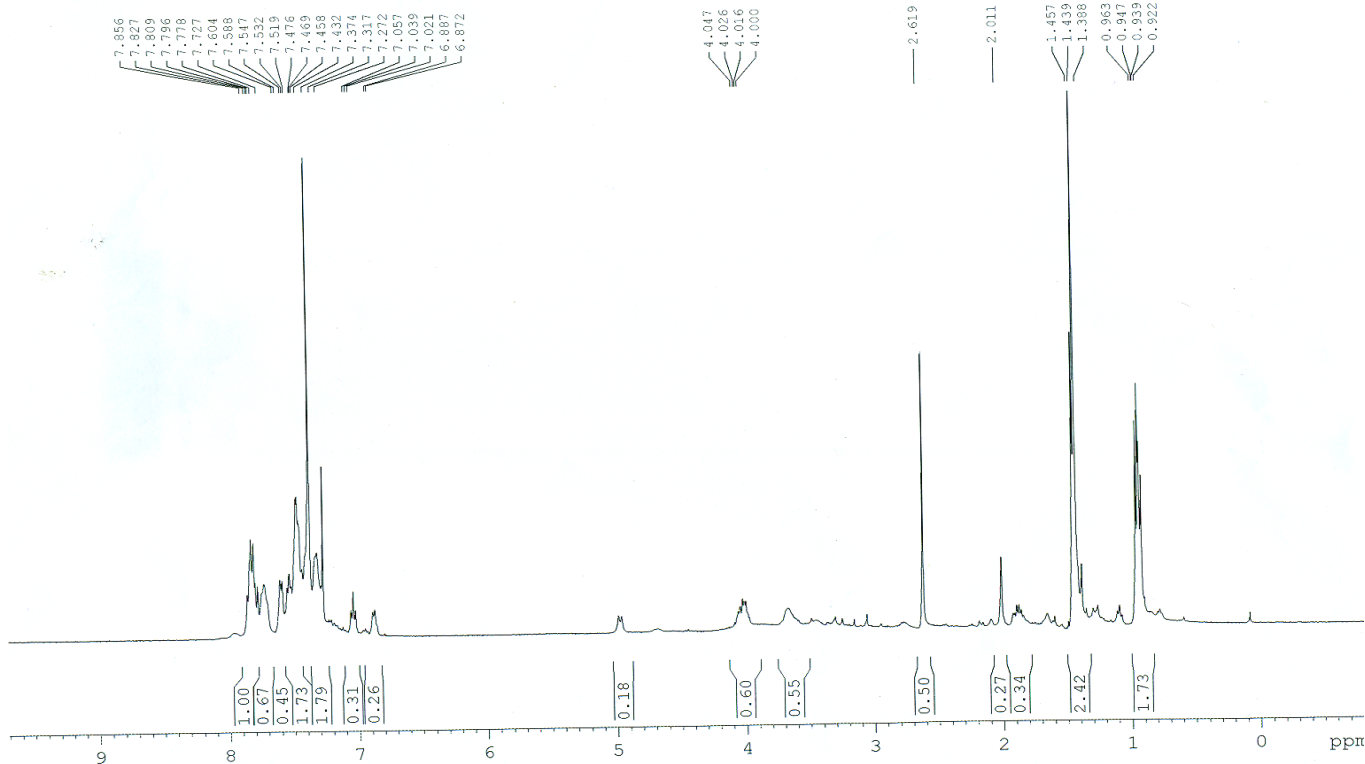

Figure S6 <sup>1</sup>H NMR (400 MHz) spectrum of 1

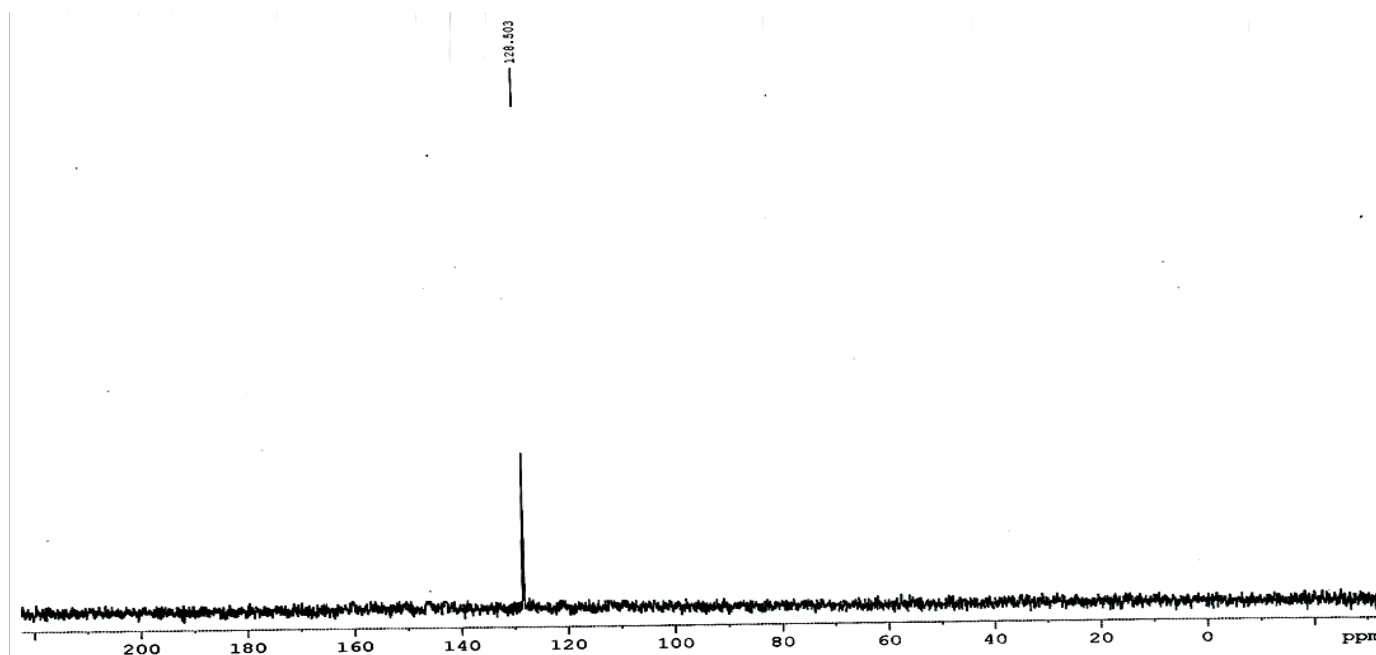

Figure S7  $^{31}\text{P}$  NMR (161.98 MHz) spectrum of 1

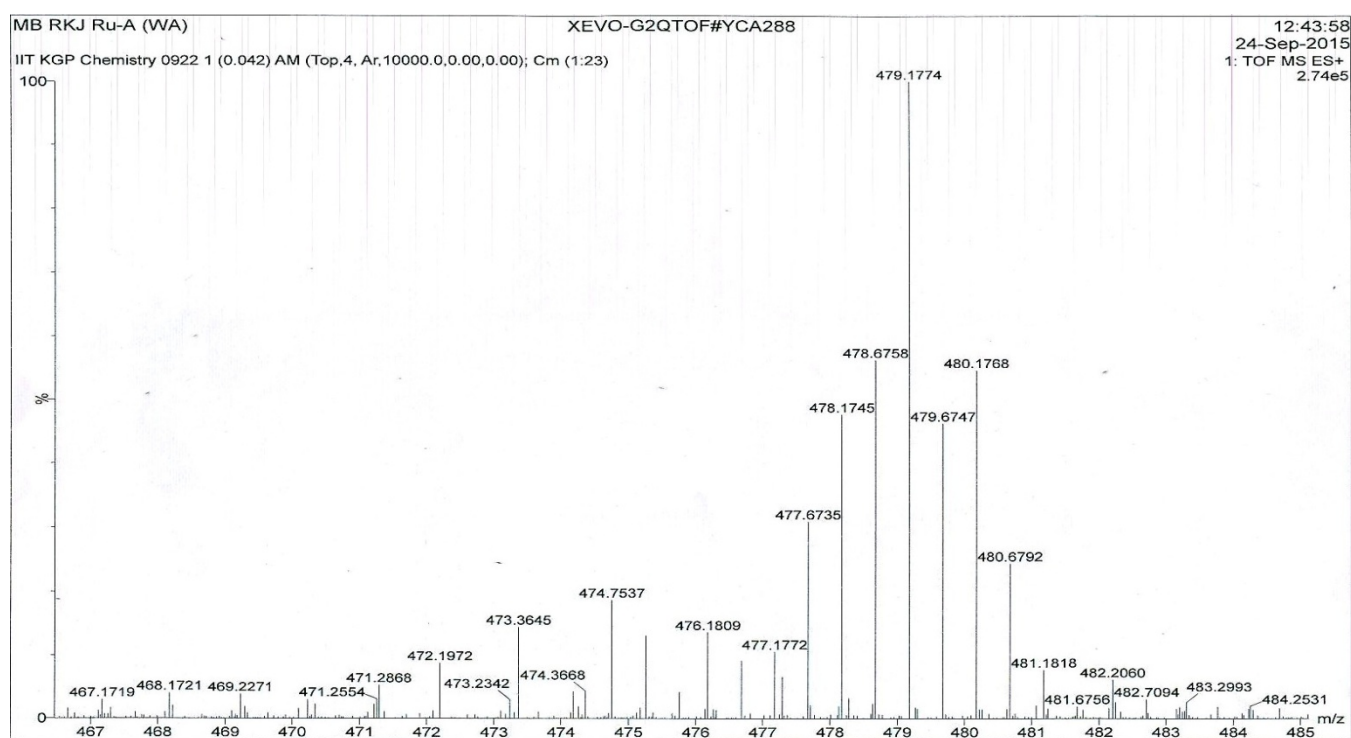

Figure S8 HRMS of 1

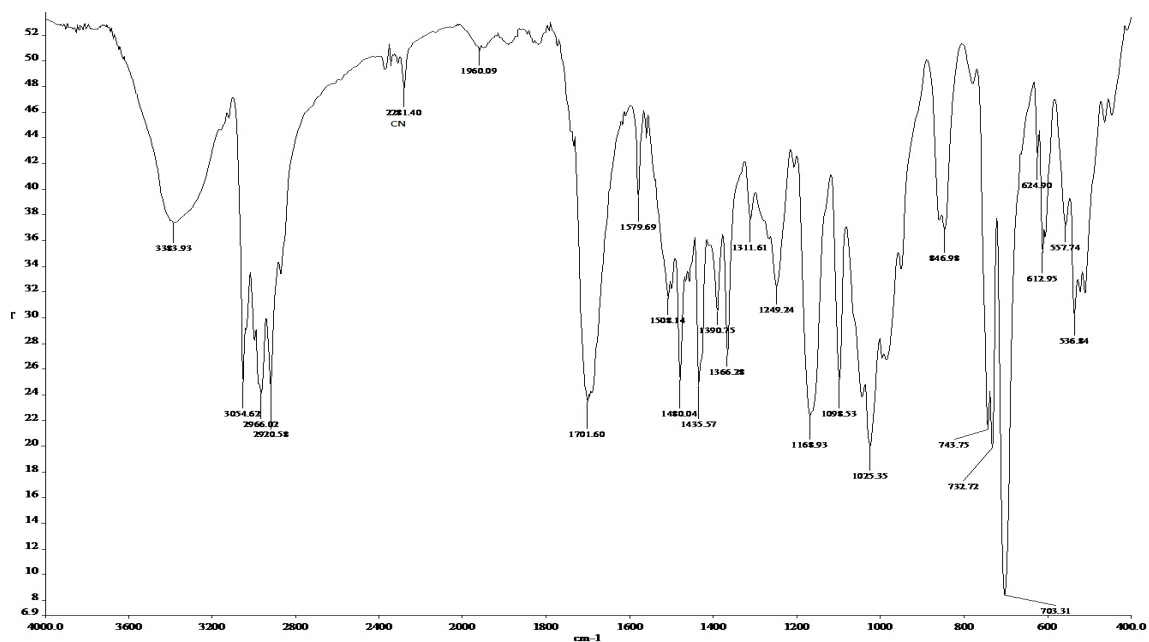

Figure S9 FT-IR spectrum of 1

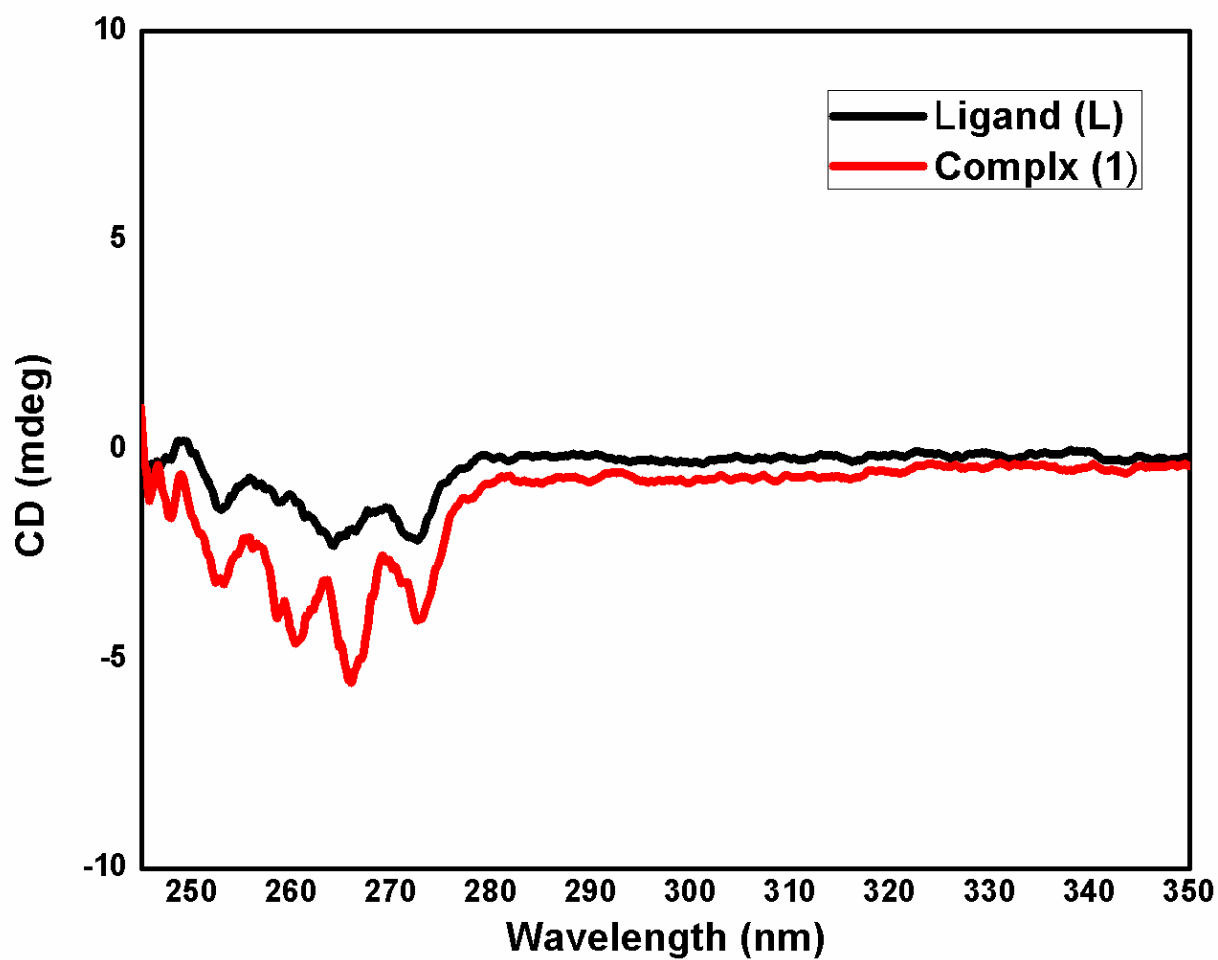

Figure S10 CD plot of L and 1

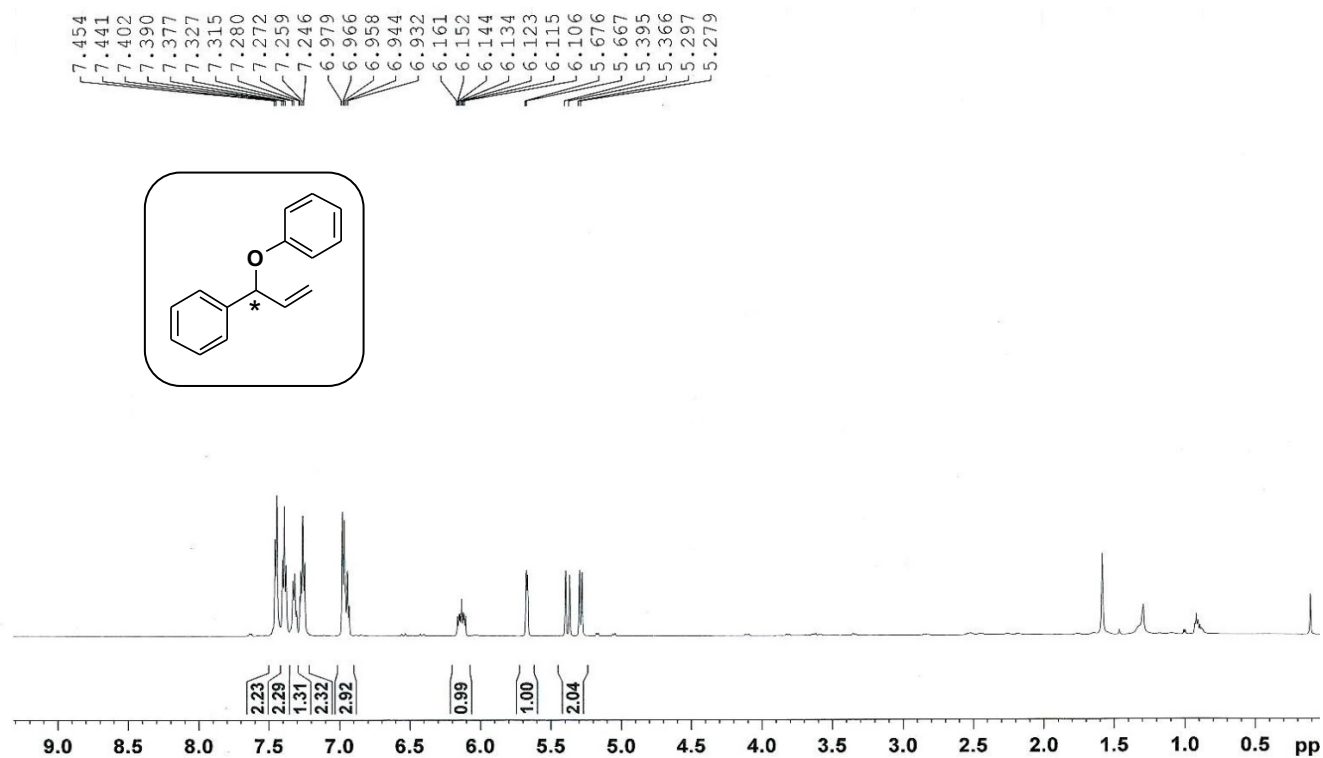

Figure S11 <sup>1</sup>H NMR (600 MHz) spectrum of 1-Phenyl-1-phenoxyprop-2-ene (4a) in CDCl<sub>3</sub>.

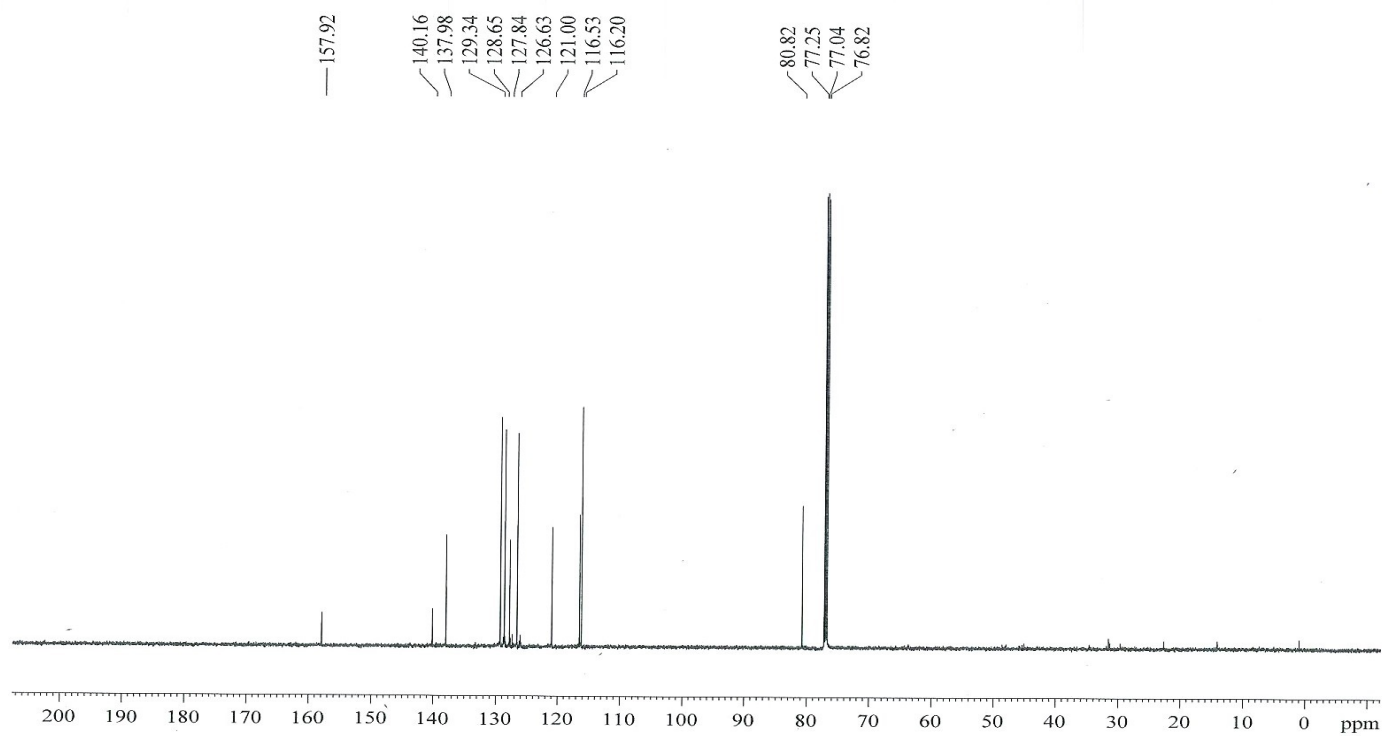

Figure S12 <sup>13</sup>C NMR (150 MHz) spectrum of 1-Phenyl-1-phenoxyprop-2-ene (4a) in CDCl<sub>3</sub>.

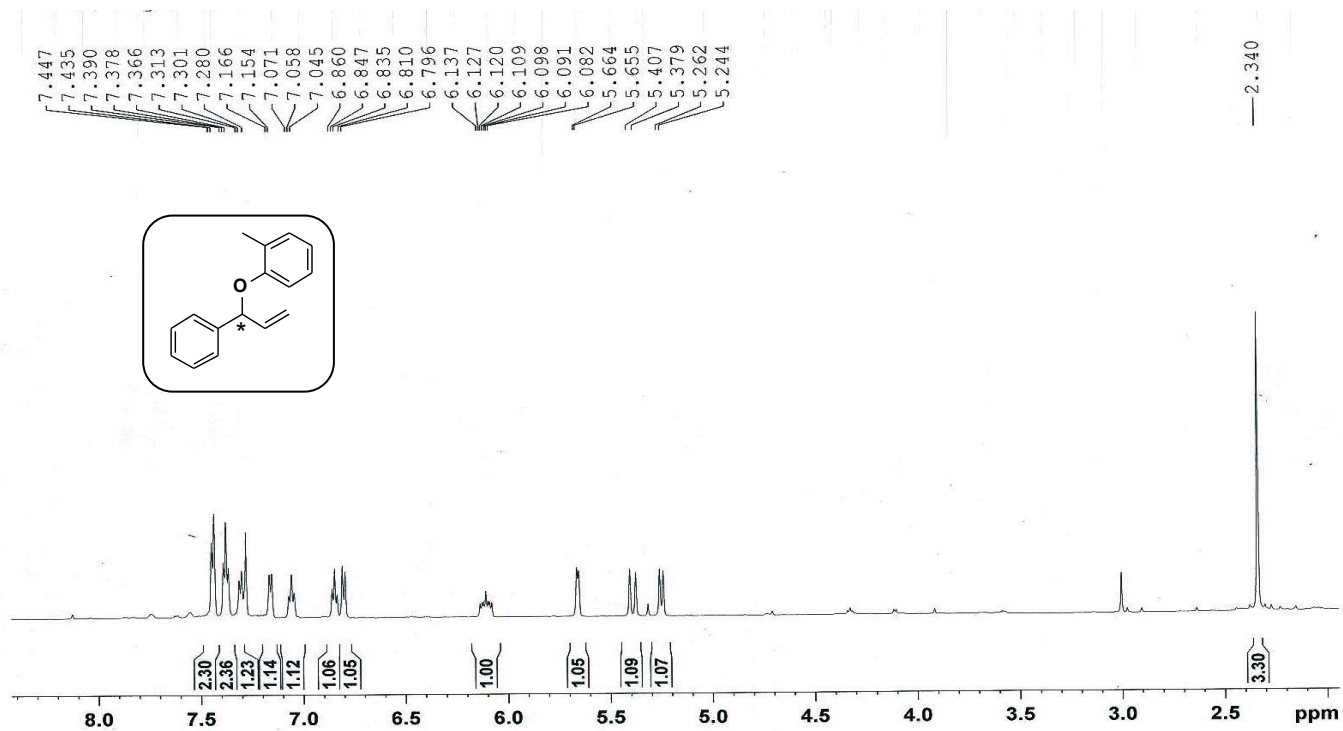

Figure S13 <sup>1</sup>H NMR (600 MHz) spectrum of 1-Phenyl-1-(o-methylphenoxy)prop-2-ene (4b) in CDCl<sub>3</sub>.

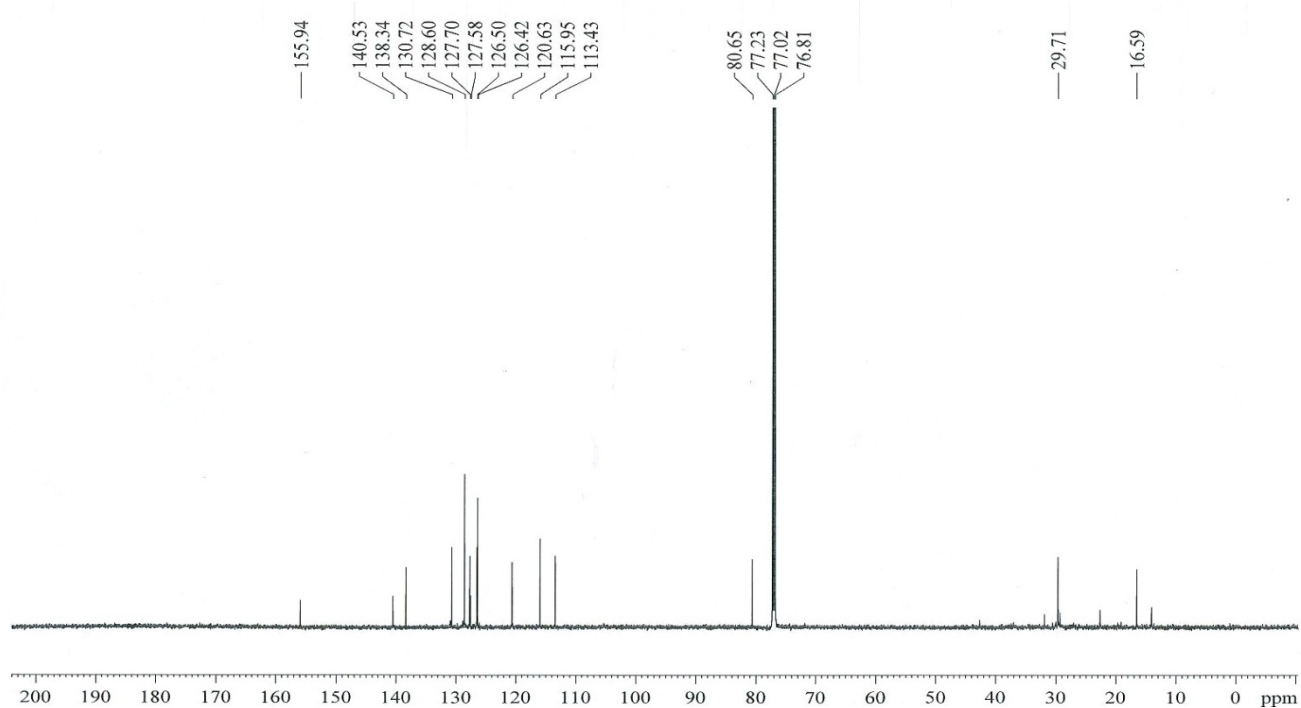

Figure S14 <sup>13</sup>C NMR (150 MHz) spectrum of 1-Phenyl-1-(o-methylphenoxy)prop-2-ene (4b) in CDCl<sub>3</sub>.



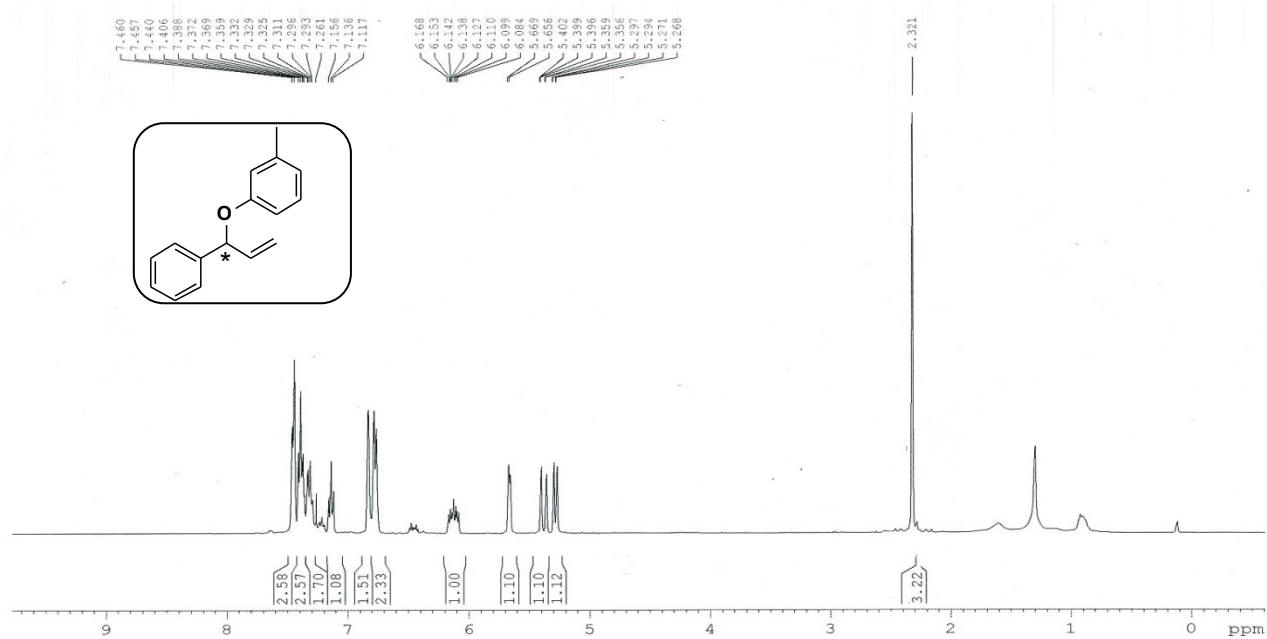

Figure S15 <sup>1</sup>H NMR (400 MHz) spectrum of 1-Phenyl-1-(m-methylphenoxy)prop-2-ene (4c) in CDCl<sub>3</sub>.

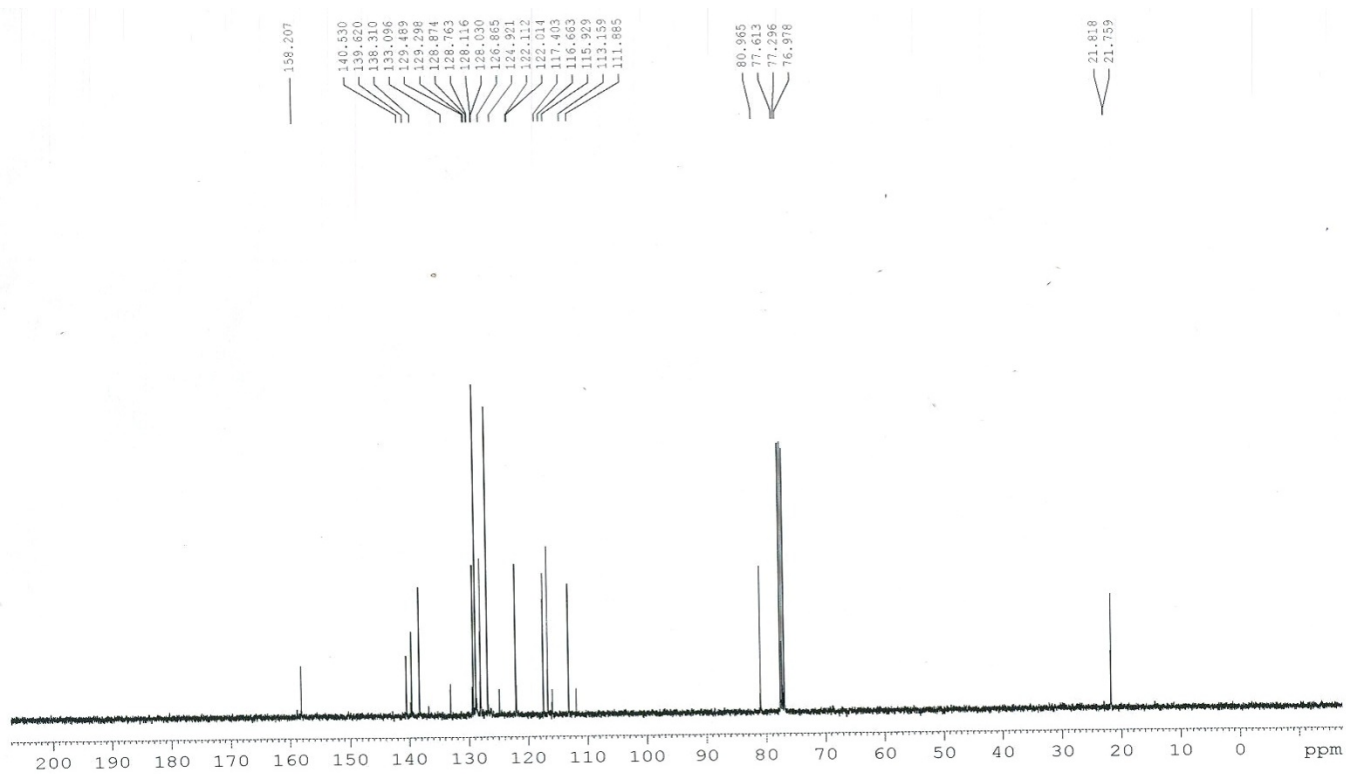

Figure S16 <sup>13</sup>C NMR (100 MHz) spectrum of 1-Phenyl-1-(m-methylphenoxy)prop-2-ene (4c) in CDCl<sub>3</sub>.

M Bhattacharjee  
mb / rkj / m-278- 1h-f107

-2.32

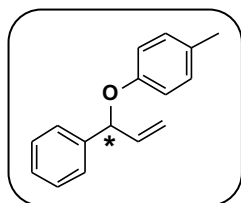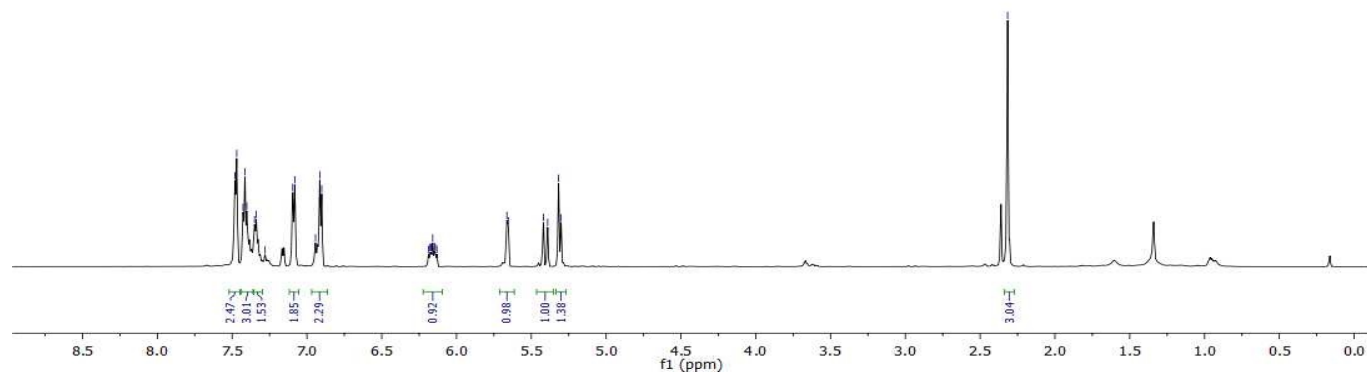

Figure S17  $^1\text{H}$  NMR (600 MHz) spectrum of 1-Phenyl-1-(p-methylphenoxy)prop-2-ene (4d) in  $\text{CDCl}_3$ .

M Bhattacharjee  
mb / rkj / m-278- 13c-f108

140.36  
138.17

129.84  
128.66  
127.82  
126.68

116.48  
116.18  
114.73

81.07  
77.31  
77.10  
76.89

-20.53

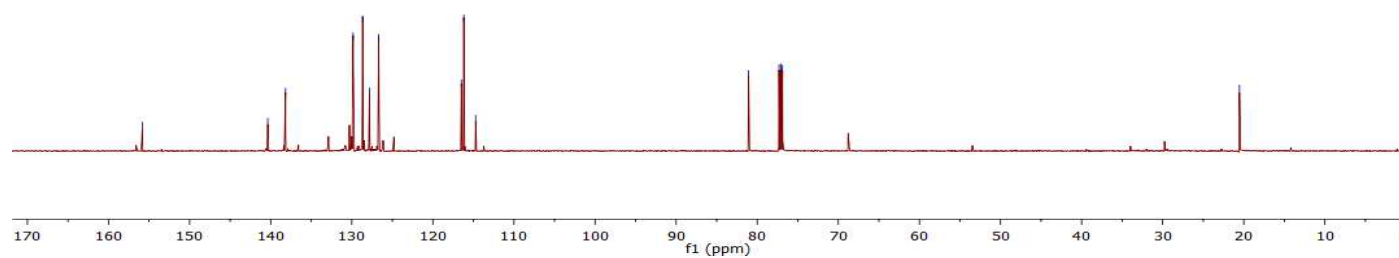

Figure S18  $^{13}\text{C}$  NMR (150 MHz) spectrum of 1-Phenyl-1-(p-methylphenoxy)prop-2-ene (4d) in  $\text{CDCl}_3$ .

M Bhattacharjee  
mb / rkj / n-279- 1h-f1

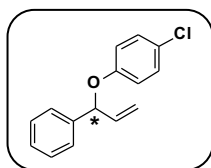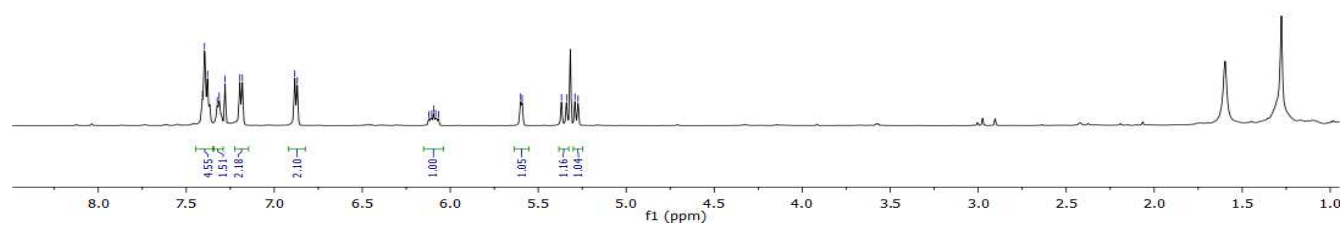

Figure S19  $^1\text{H}$  NMR (600 MHz) spectrum of 1-Phenyl-1-(*p*-chlorophenoxy)prop-2-ene (4e) in  $\text{CDCl}_3$ .

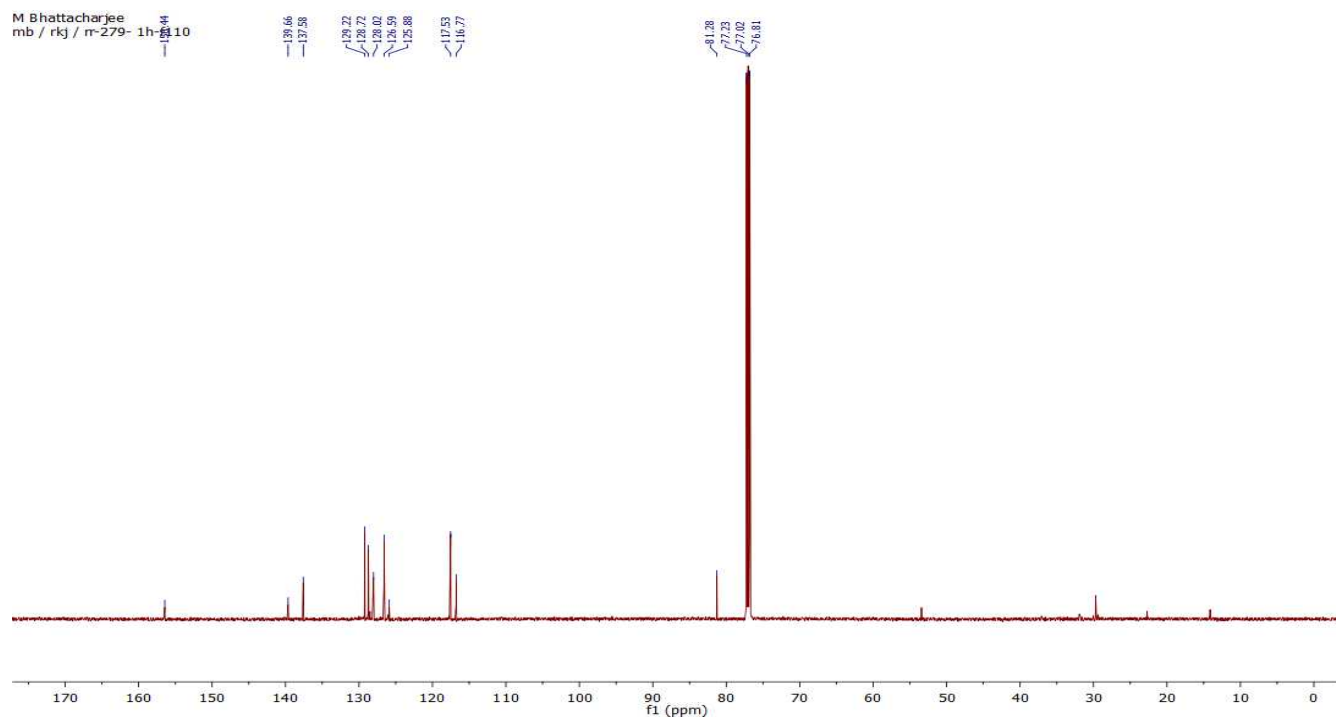

Figure S20  $^{13}\text{C}$  NMR (100 MHz) spectrum of 1-Phenyl-1-(*p*-chlorophenoxy)prop-2-ene (4e) in  $\text{CDCl}_3$ .

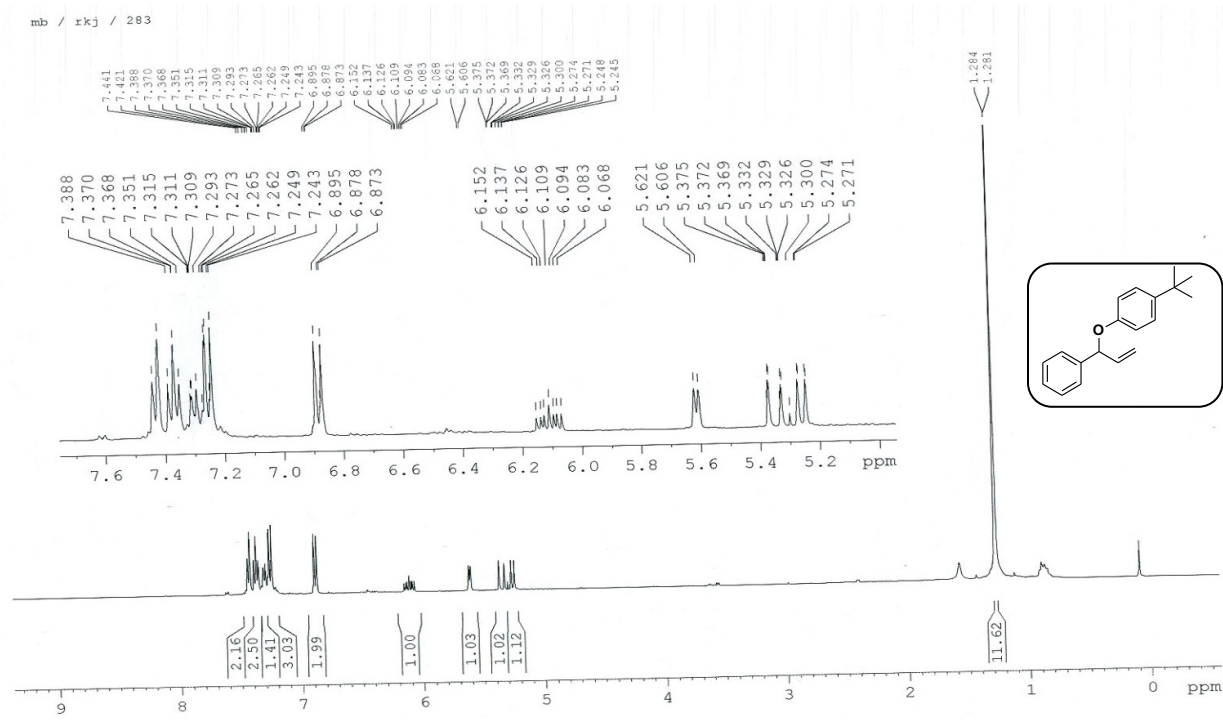

Figure S21 <sup>1</sup>H NMR (400 MHz) spectrum of 1-Phenyl-1-(*p*-tert-butylphenoxy)prop-2-ene (4f) in CDCl<sub>3</sub>.

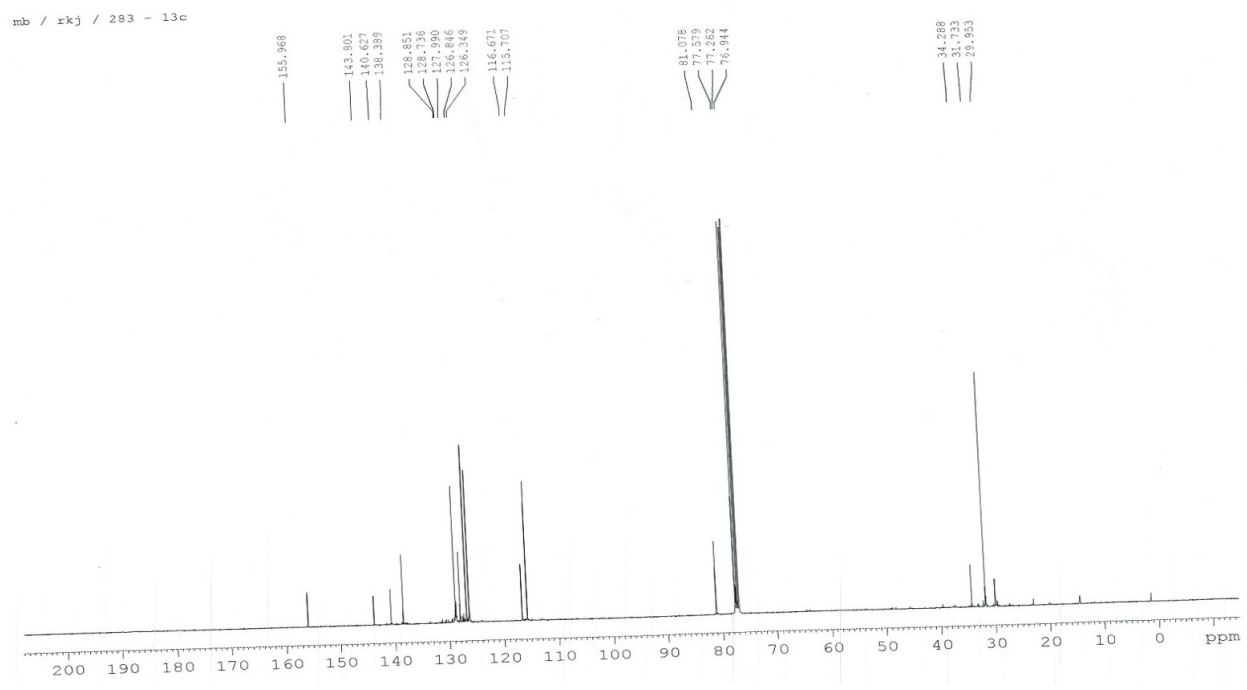

Figure S22 <sup>13</sup>C NMR (100 MHz) spectrum of 1-Phenyl-1-(*p*-tert-butylphenoxy)prop-2-ene (4f) in CDCl<sub>3</sub>.

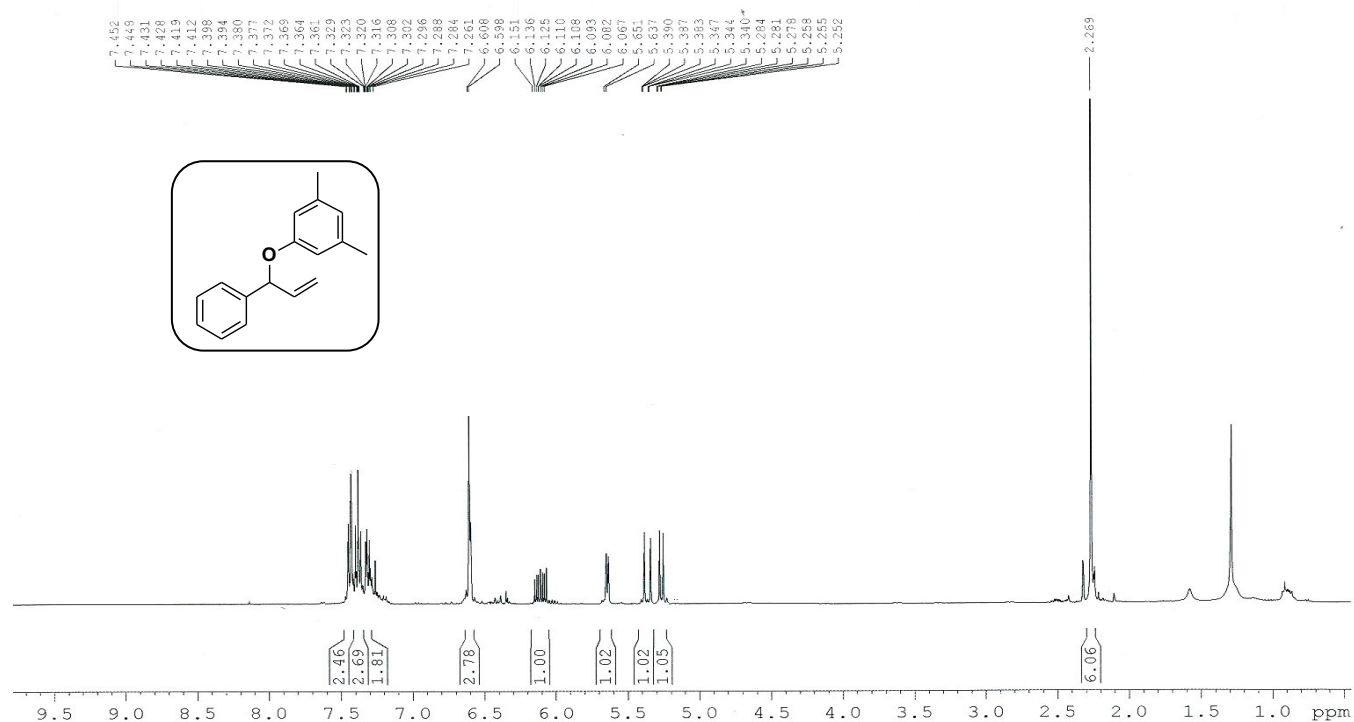

Figure S23 <sup>1</sup>H NMR (400 MHz) spectrum of 1-Phenyl-1-(3,5-dimethylphenoxy)prop-2-ene (4g) in CDCl<sub>3</sub>.

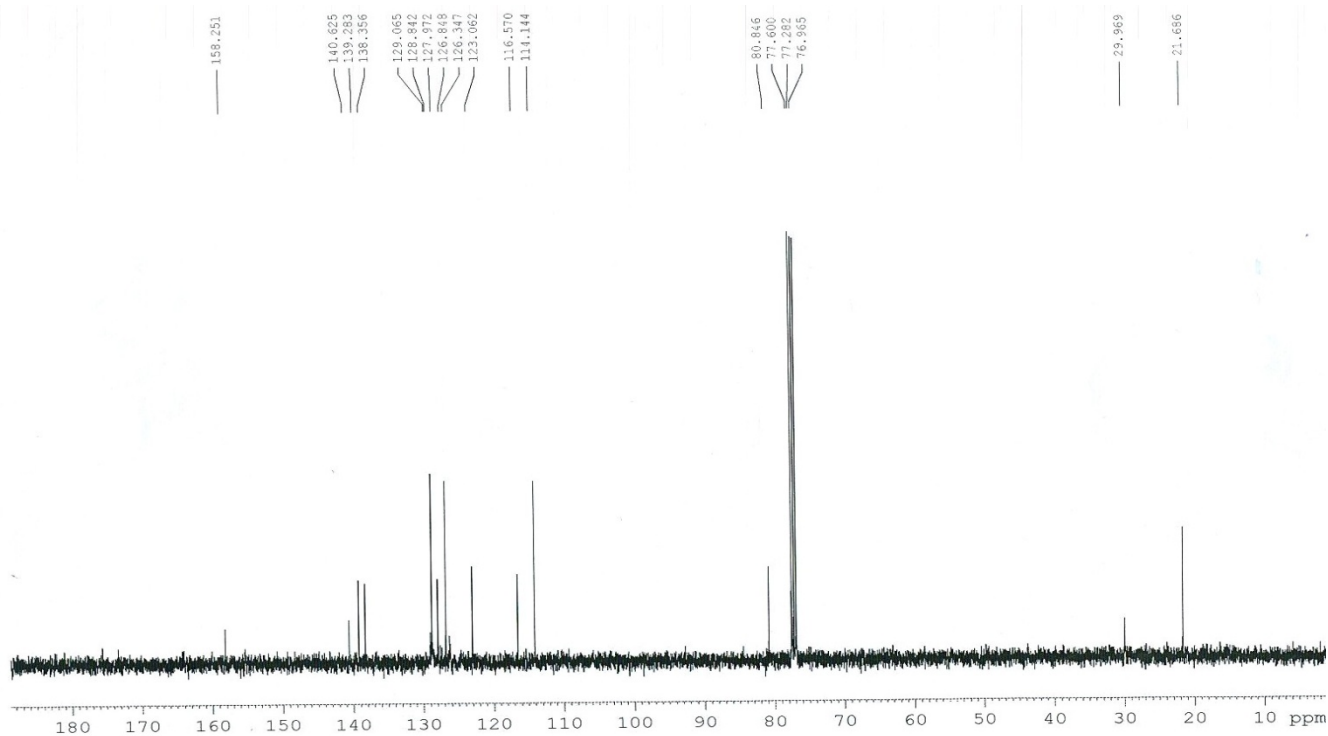

Figure S24 <sup>13</sup>C NMR (400 MHz) spectrum of 1-Phenyl-1-(3,5-dimethylphenoxy)prop-2-ene (4g) in CDCl<sub>3</sub>.

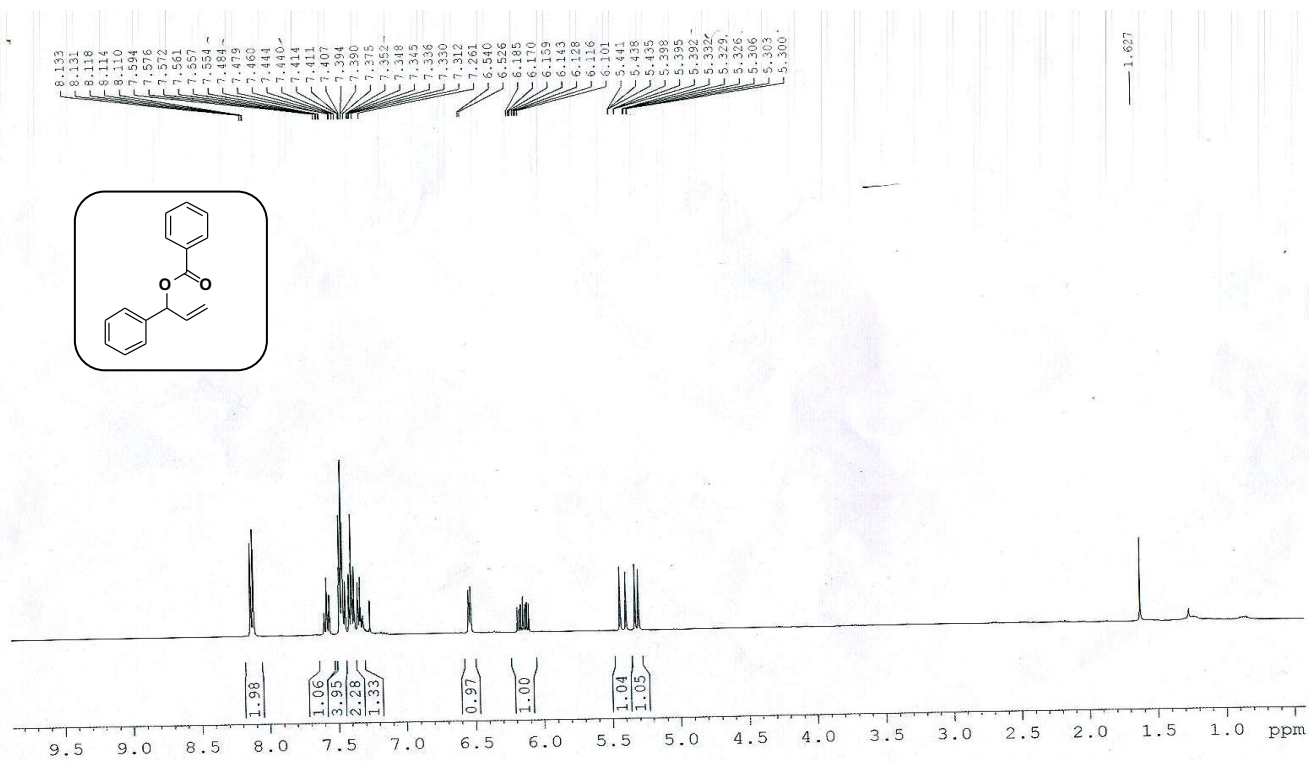

Figure S25 <sup>1</sup>H NMR (400 MHz) spectrum of 1-Phenyl-2-propenyl benzoate (7a) in CDCl<sub>3</sub>.

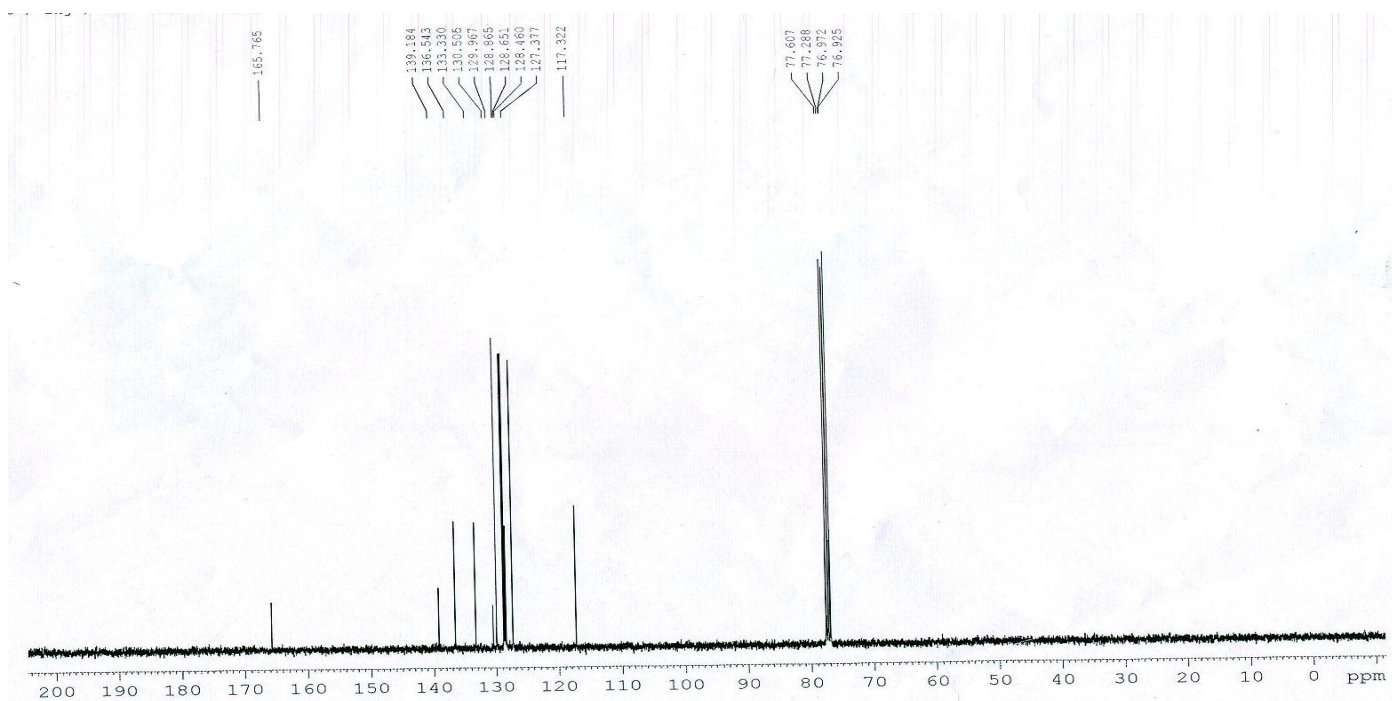

Figure S26 <sup>13</sup>C NMR (100 MHz) spectrum of 1-Phenyl-2-propenyl benzoate (7a) in CDCl<sub>3</sub>.

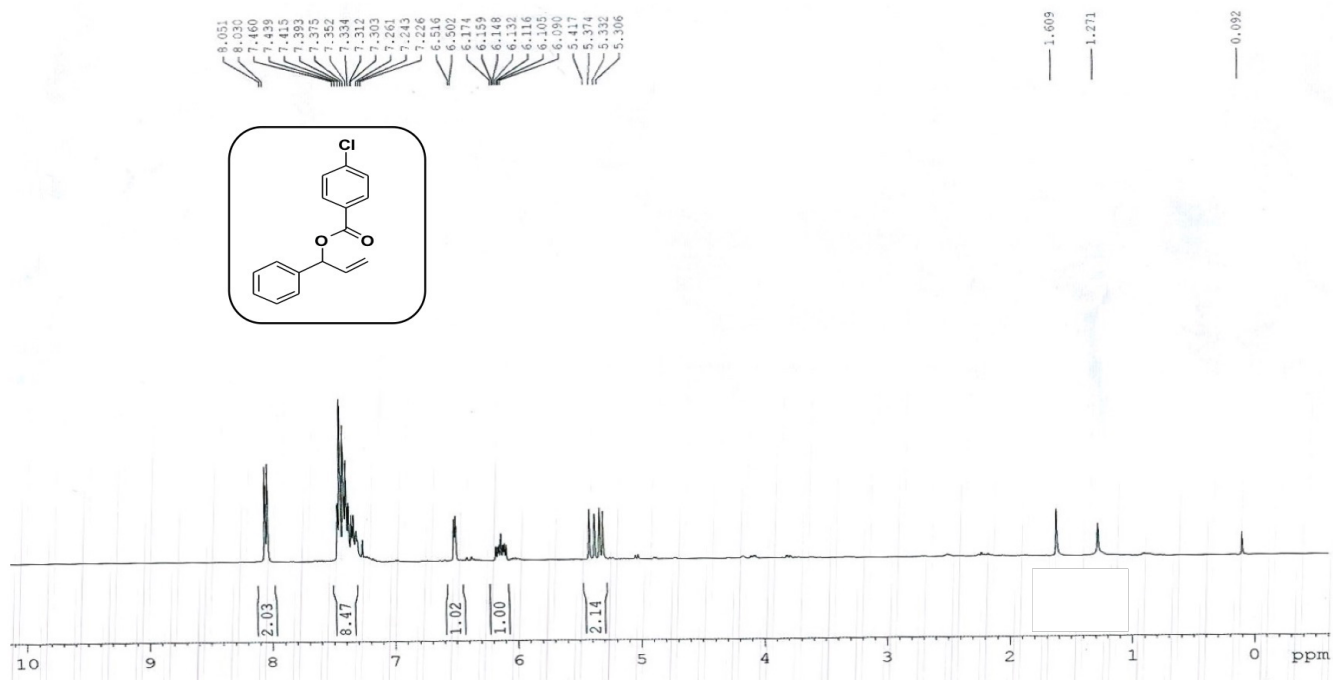

Figure S27 <sup>1</sup>H NMR (400 MHz) spectrum of 1-Phenyl-2-propenyl-4-chlorobenzoate(7b) in CDCl<sub>3</sub>.

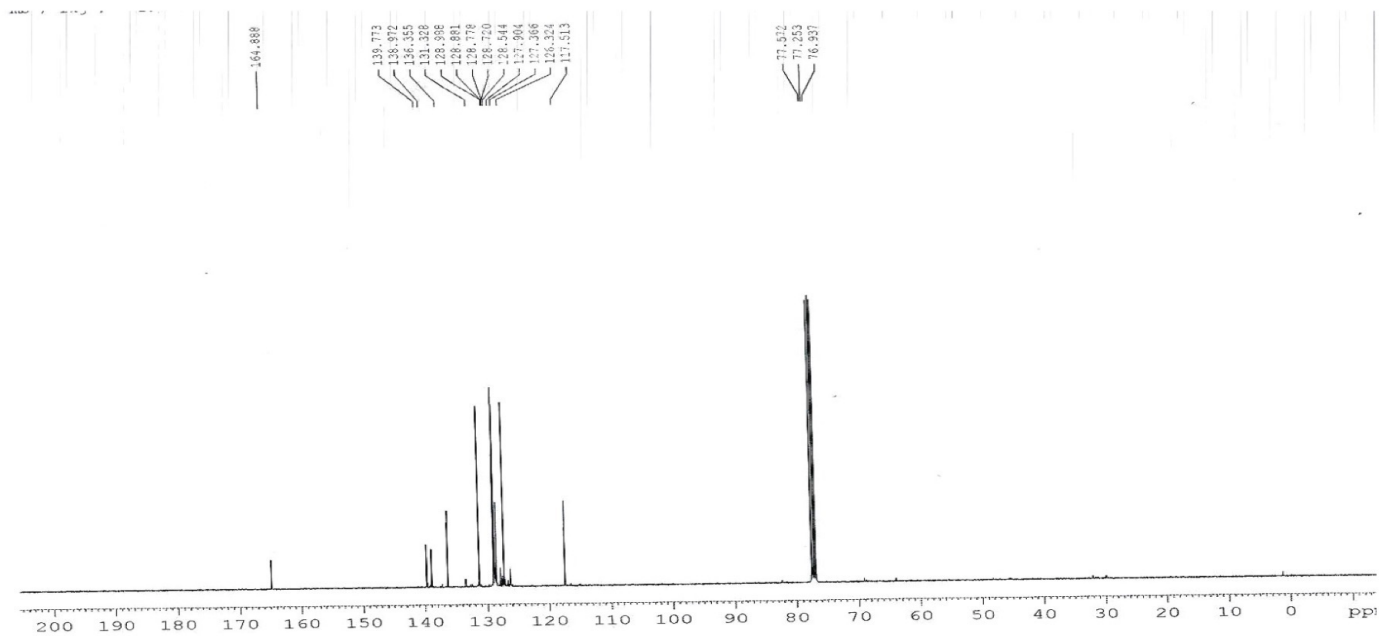

Figure S28 <sup>13</sup>C NMR (100 MHz) spectrum of 1-Phenyl-2-propenyl-4-chlorobenzoate (7b) in CDCl<sub>3</sub>.

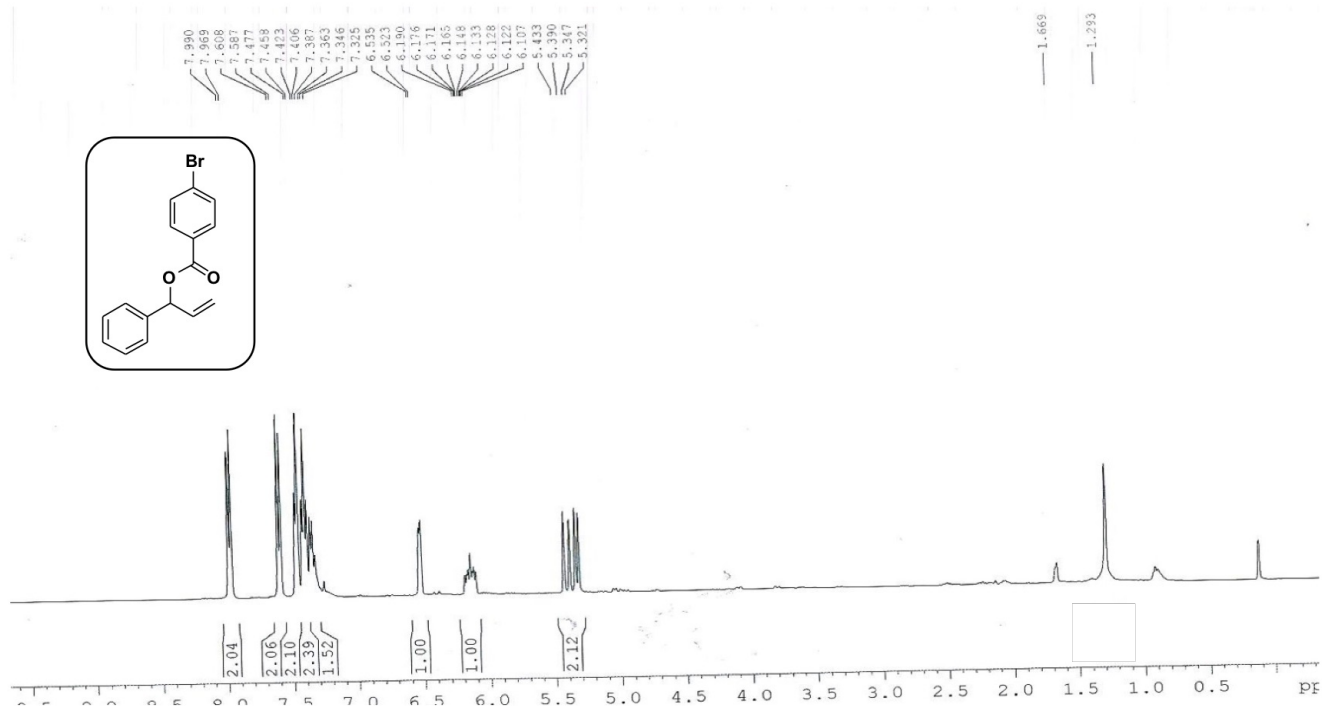

Figure S29 <sup>1</sup>H NMR (400 MHz) spectrum of 1-Phenyl-2-propenyl 4-bromobenzoate (7c) in CDCl<sub>3</sub>.

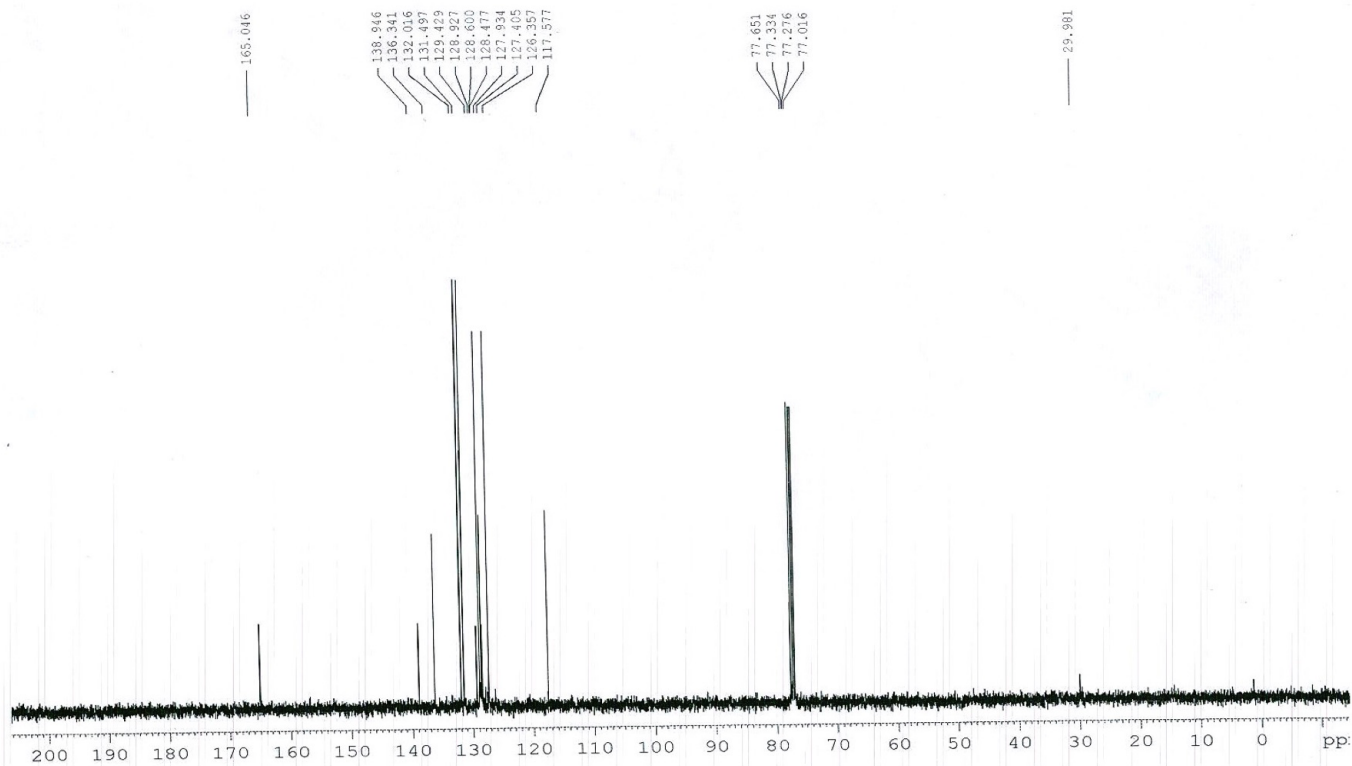

Figure S30 <sup>13</sup>C NMR (100 MHz) spectrum of 1-Phenyl-2-propenyl 4-bromobenzoate (7c) in CDCl<sub>3</sub>.



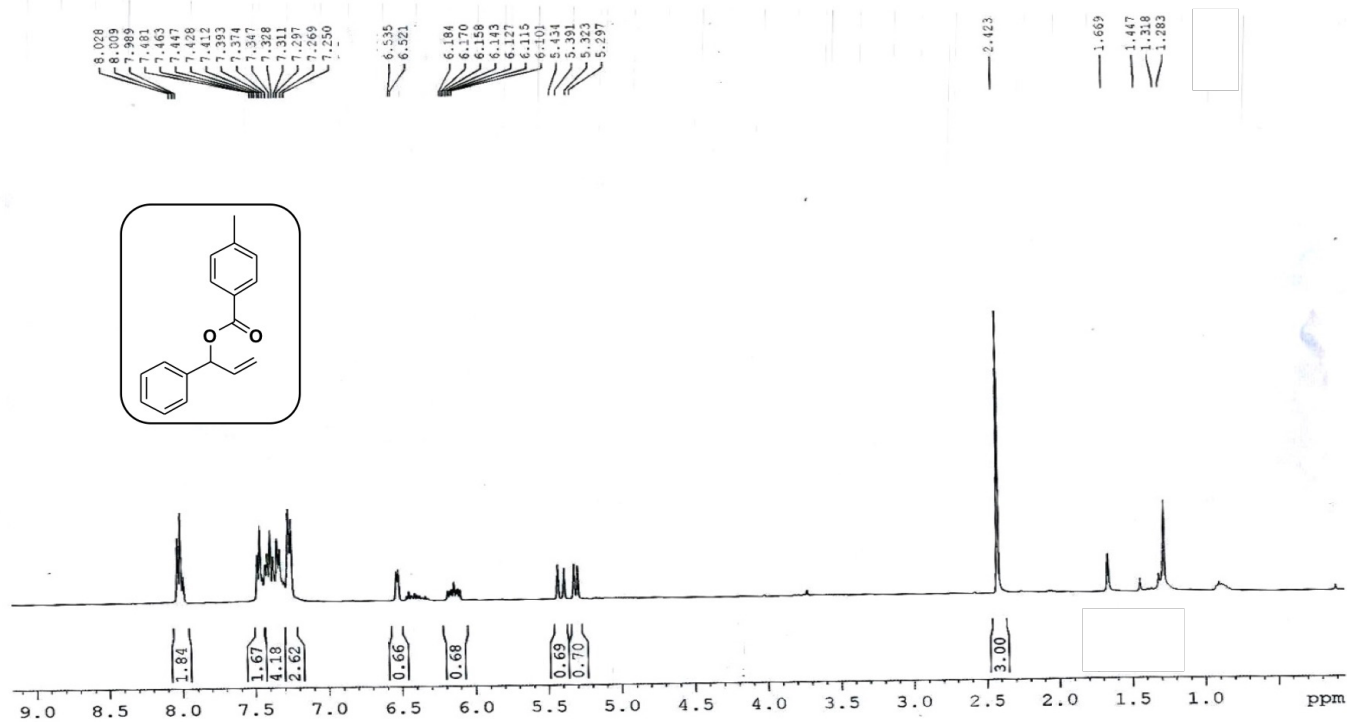

Figure S31 <sup>1</sup>H NMR (400MHz) spectrum of 1-Phenyl-2-propenyl 4-methylbenzoate (7d) in CDCl<sub>3</sub>.

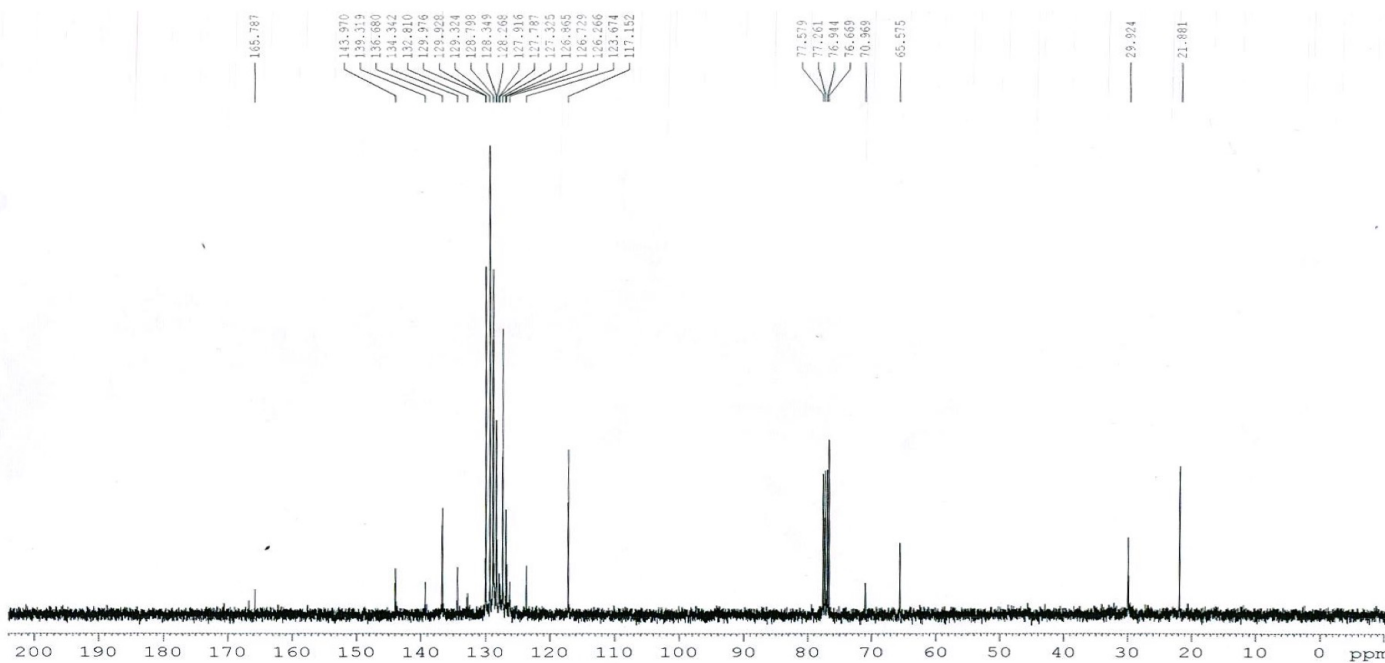

Figure S32 <sup>13</sup>C NMR (100MHz) spectrum of 1-Phenyl-2-propenyl 4-methylbenzoate (7d) in CDCl<sub>3</sub>.

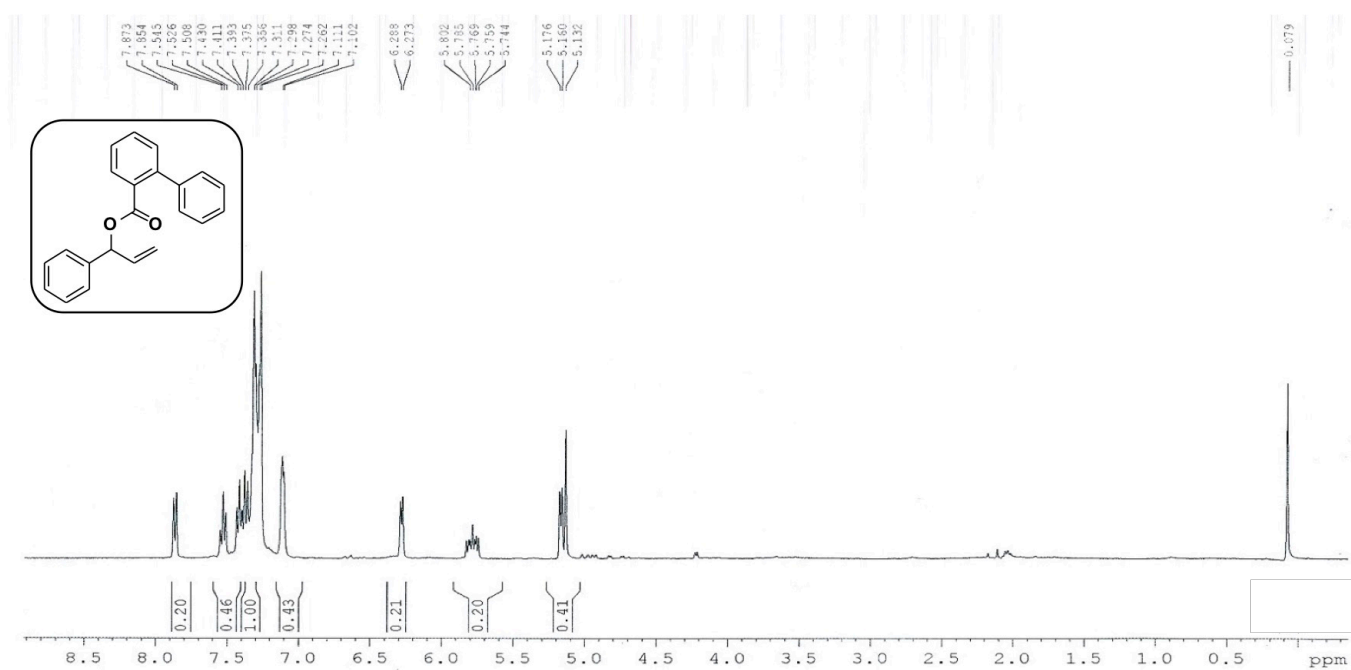

Figure S33  $^1\text{H}$  NMR (400MHz) spectrum of 1-phenylallyl biphenyl-2-carboxylate (7e) in  $\text{CDCl}_3$ .

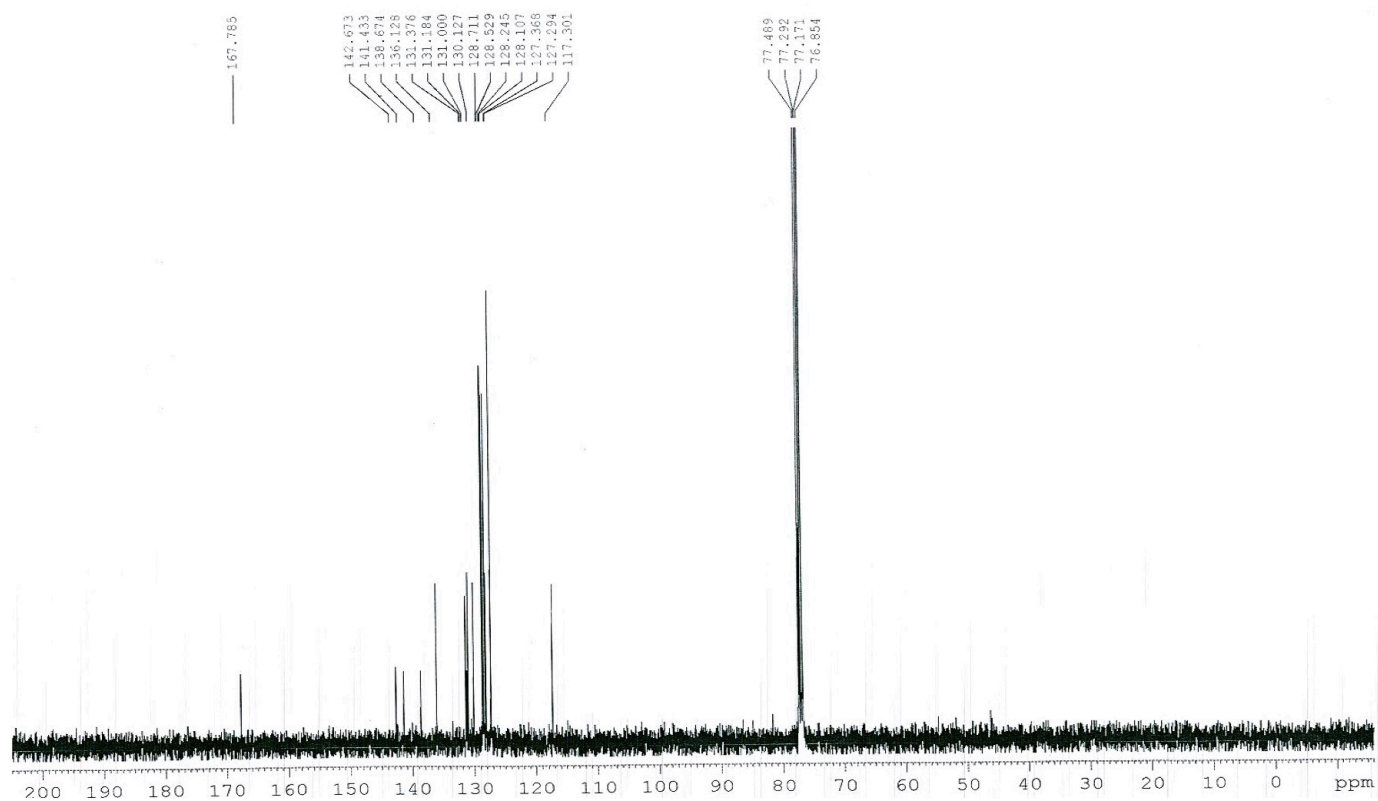

Figure S34  $^{13}\text{C}$  NMR (100MHz) spectrum of 1-phenylallyl biphenyl-2-carboxylate (7e) in  $\text{CDCl}_3$ .

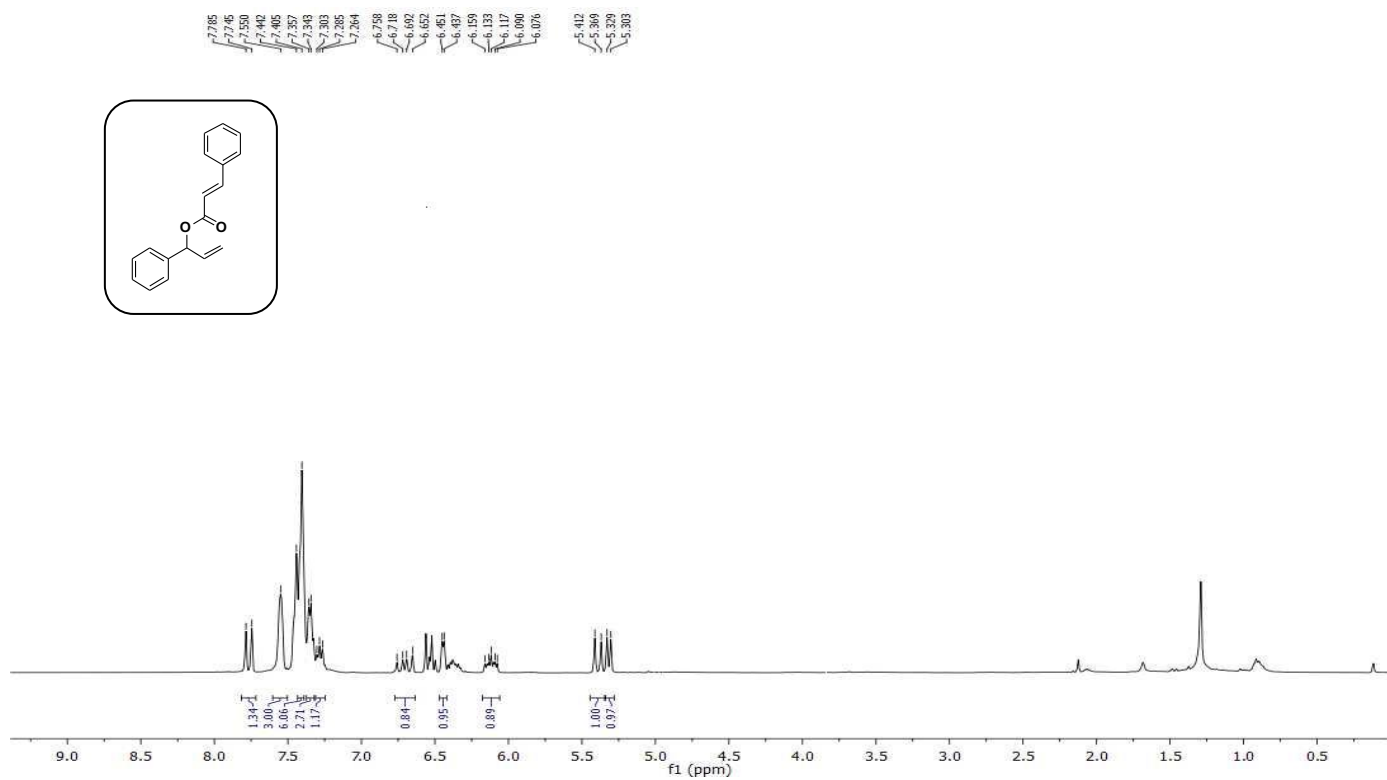

Figure S35 <sup>1</sup>H NMR (400MHz) spectrum of 1-Phenyl-2-propenyl cinnamate (7f) in CDCl<sub>3</sub>.

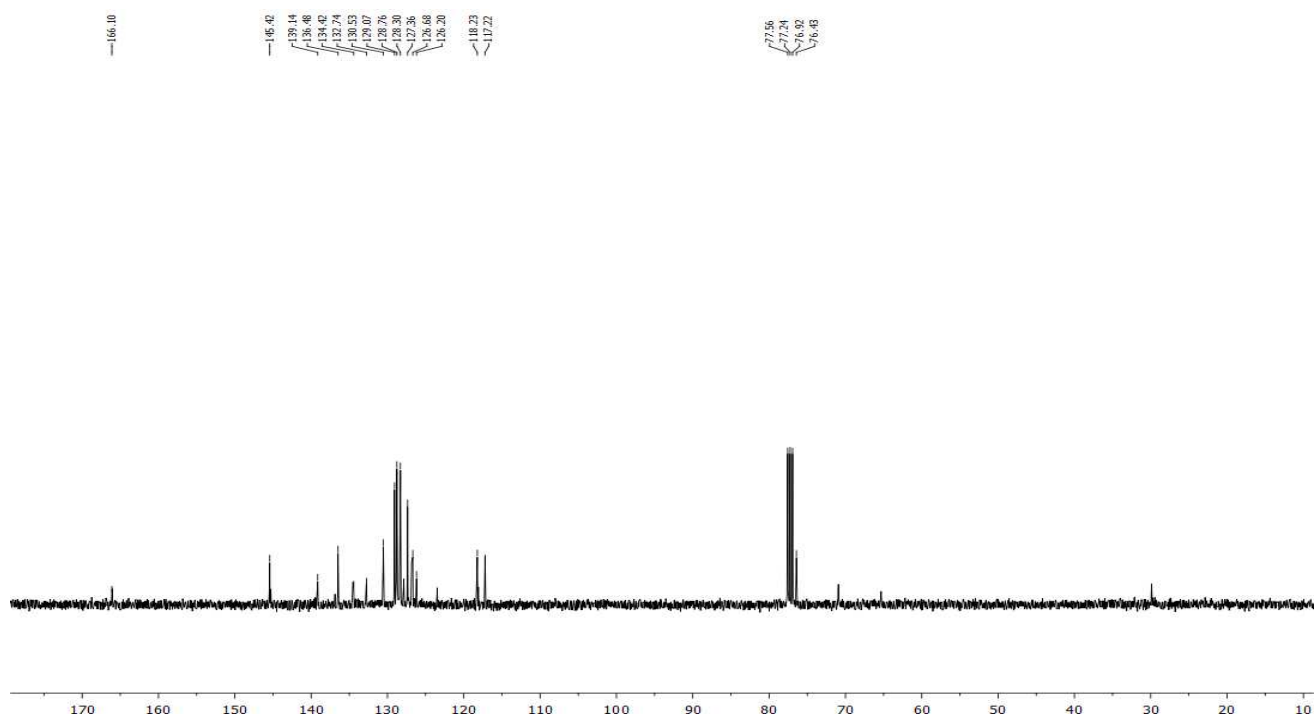

Figure S36 <sup>13</sup>C NMR (100MHz) spectrum of 1-Phenyl-2-propenyl cinnamate (7f) in CDCl<sub>3</sub>.

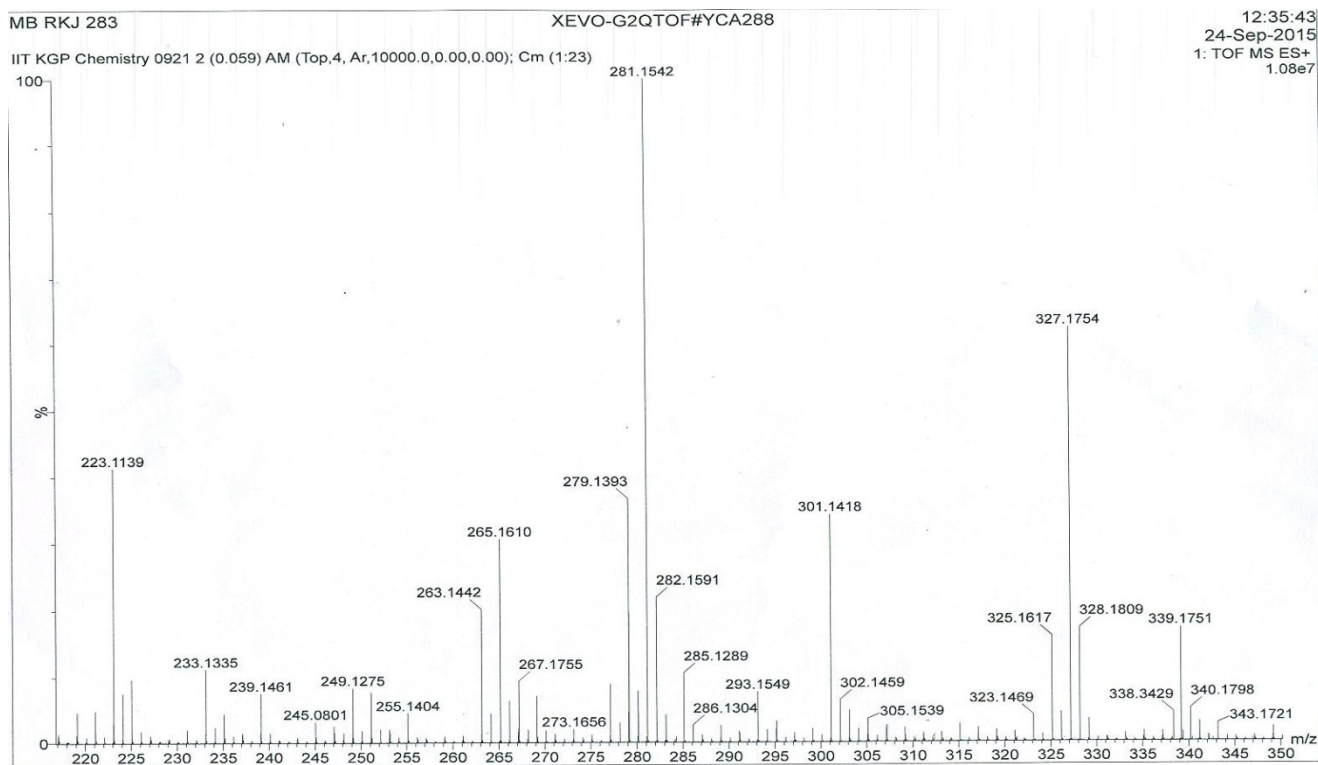

Figure S37 HRMS of 4f

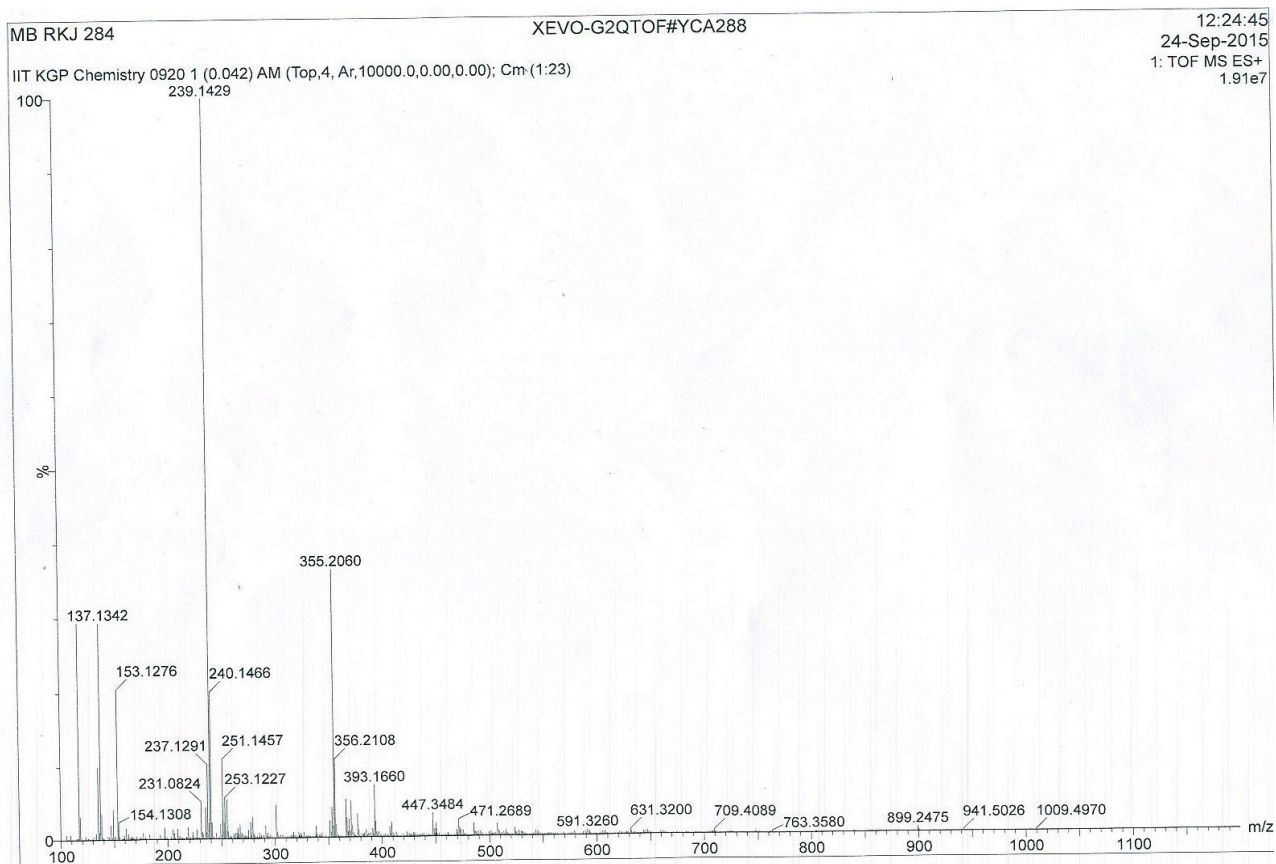

Figure S38 HRMS of 4g

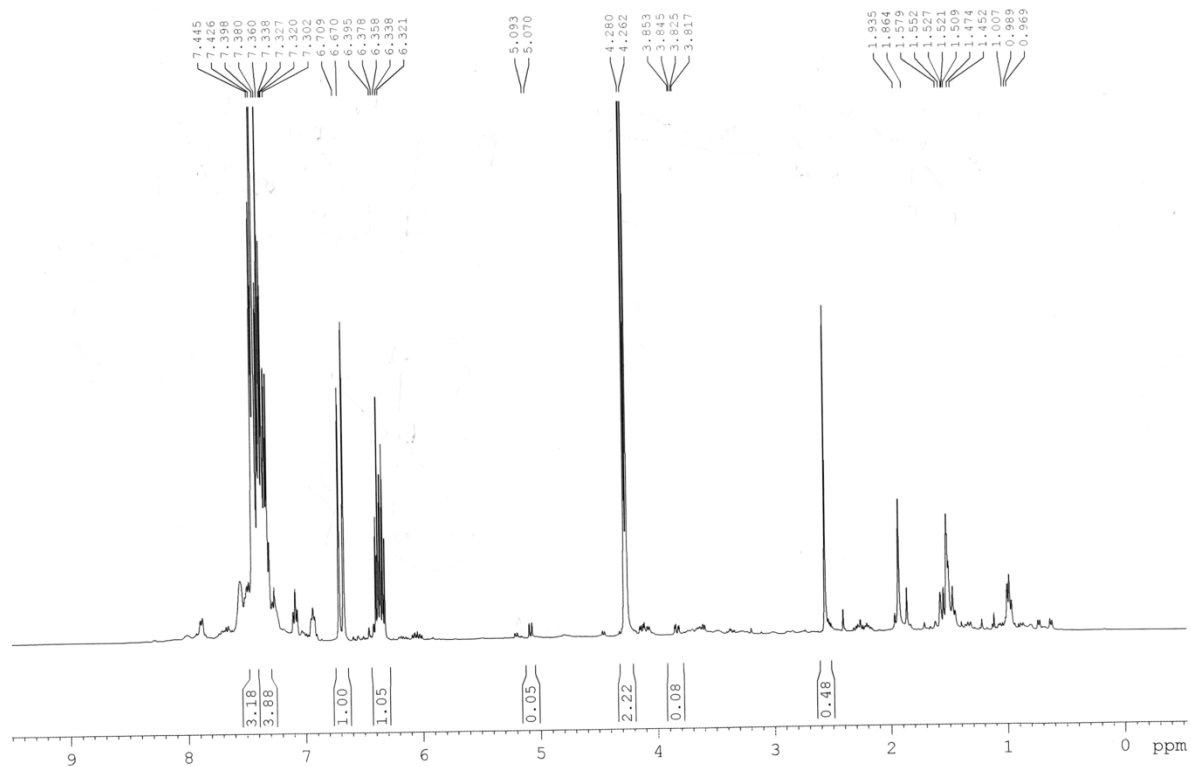

Figure S39  $^1\text{H}$  NMR (400 MHz) spectrum of **1** + cinnamyl alcohol (**2a**) in  $\text{CD}_3\text{CN}$ .

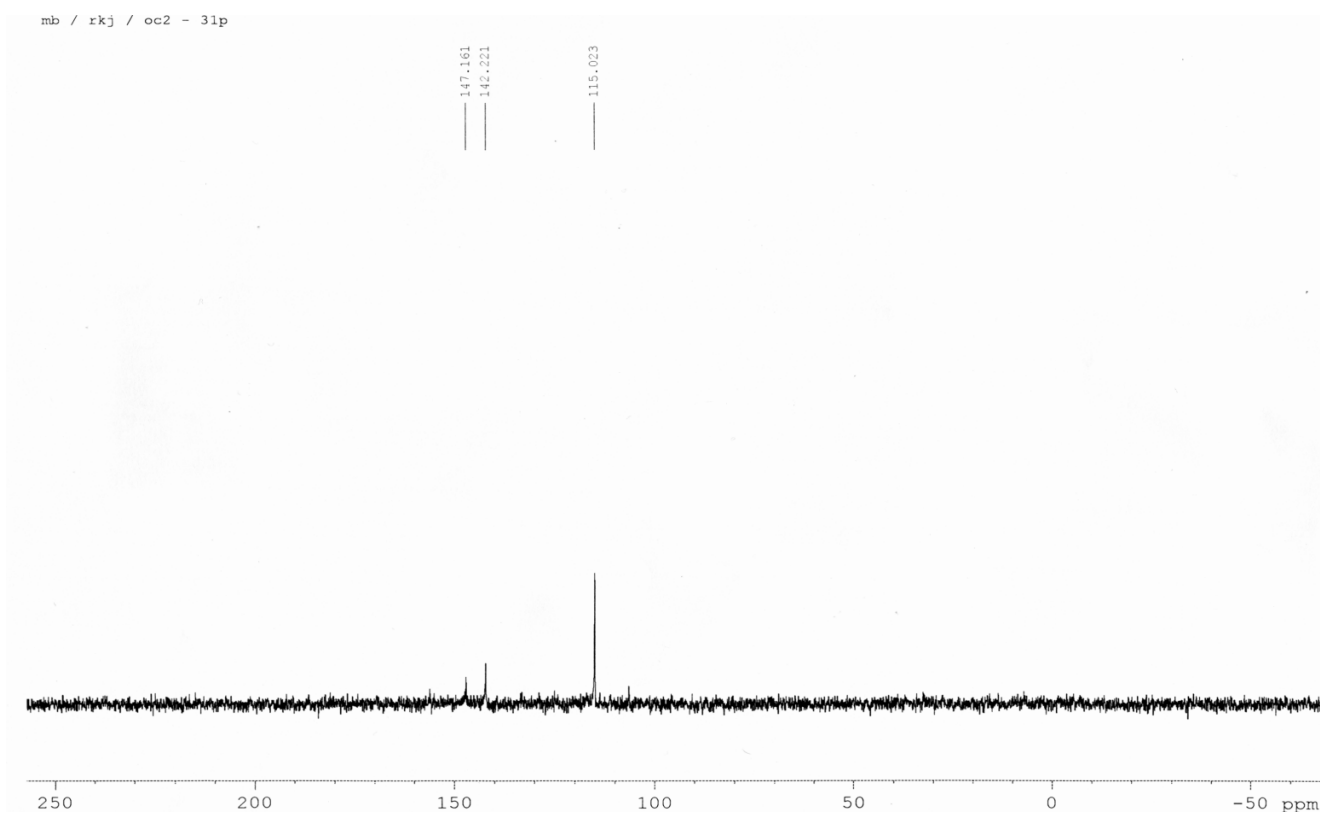

Figure S40  $^{13}\text{P}$  NMR (161.98 MHz) spectrum of **1** + cinnamyl alcohol (**2a**) in  $\text{CD}_3\text{CN}$ .

Sample Info : RKJ-1-2  
 CHIRALPAK IA-3, 250 MM, IPA/HEXANE : 10:90, 1.0 ml/min flow rate, 254

Additional Info : Peak(s) manually integrated

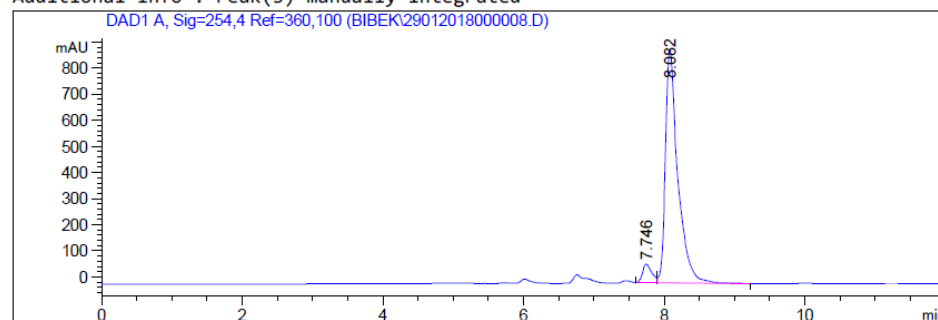

=====  
 Area Percent Report  
 =====

Sorted By : Signal  
 Multiplier : 1.0000  
 Dilution : 1.0000  
 Use Multiplier & Dilution Factor with ISTDs

Signal 1: DAD1 A, Sig=254,4 Ref=360,100

| Peak # | RetTime [min] | Type | Width [min] | Area [mAU*s] | Height [mAU] | Area %  |
|--------|---------------|------|-------------|--------------|--------------|---------|
| 1      | 7.746         | BV   | 0.1363      | 651.34174    | 71.45866     | 5.6403  |
| 2      | 8.082         | VB   | 0.1764      | 1.08967e4    | 892.80103    | 94.3597 |

Totals : 1.15480e4 964.25969

Figure S41 Chiral HPLC of 4a

Sample Info : R J 383  
CHIRALPAK IA-3 250MM , 10 % iPrOH/HEXANE 1.0 ml/min flow rate, 254 nm

Additional Info : Peak(s) manually integrated

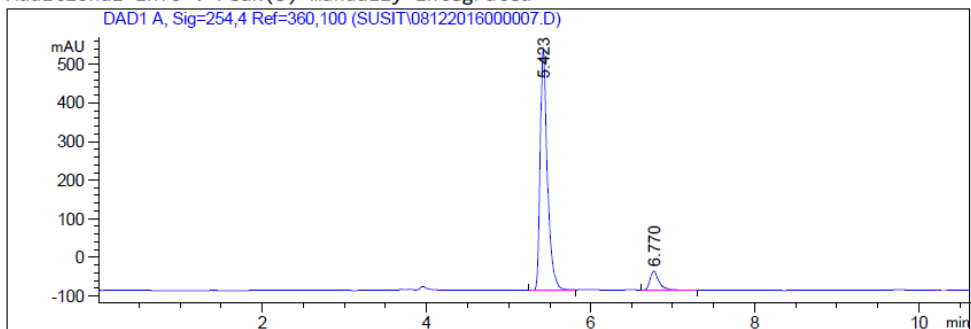

=====  
Area Percent Report  
=====

Sorted By : Signal  
Multiplier : 1.0000  
Dilution : 1.0000  
Use Multiplier & Dilution Factor with ISTDs

Signal 1: DAD1 A, Sig=254,4 Ref=360,100

| Peak # | RetTime [min] | Type | Width [min] | Area [mAU*s] | Height [mAU] | Area %  |
|--------|---------------|------|-------------|--------------|--------------|---------|
| 1      | 5.423         | BV   | 0.0891      | 3806.06372   | 624.55359    | 90.9869 |
| 2      | 6.770         | VB   | 0.1145      | 377.02780    | 49.70564     | 9.0131  |

Totals : 4183.09152 674.25923

Figure S42 Chiral HPLC of **4b**

Sample Info : RKJ-2  
CHIRALPAK IA-3, 250 MM, IPA/HEXANE : 10:90, 1.0 ml/min flow rate, 254

Additional Info : Peak(s) manually integrated

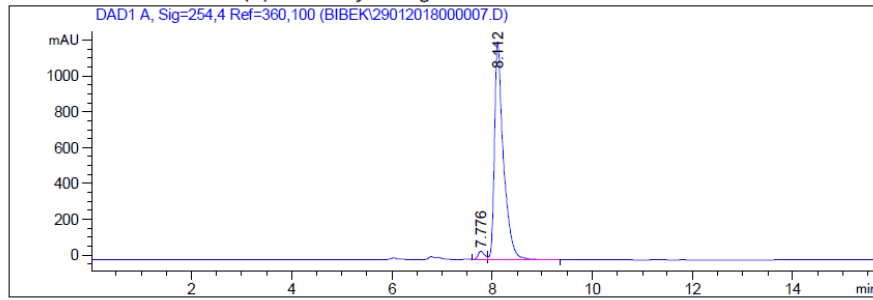

=====  
Area Percent Report  
=====

Sorted By : Signal  
Multiplier : 1.0000  
Dilution : 1.0000  
Use Multiplier & Dilution Factor with ISTDs

Signal 1: DAD1 A, Sig=254,4 Ref=360,100

| Peak # | RetTime [min] | Type | Width [min] | Area [mAU*s] | Height [mAU] | Area %  |
|--------|---------------|------|-------------|--------------|--------------|---------|
| 1      | 7.776         | BV   | 0.1377      | 427.44101    | 46.29233     | 2.7700  |
| 2      | 8.112         | VB   | 0.1781      | 1.50035e4    | 1214.52356   | 97.2300 |

Totals : 1.54310e4 1260.81589

Figure S43 Chiral HPLC of 4c



Sample Info : R J 397  
 CHIRALPAK IA-3 250MM , 10 % iPrOH/HEXANE 1.0 ml/min flow rate, 254 nm

Additional Info : Peak(s) manually integrated

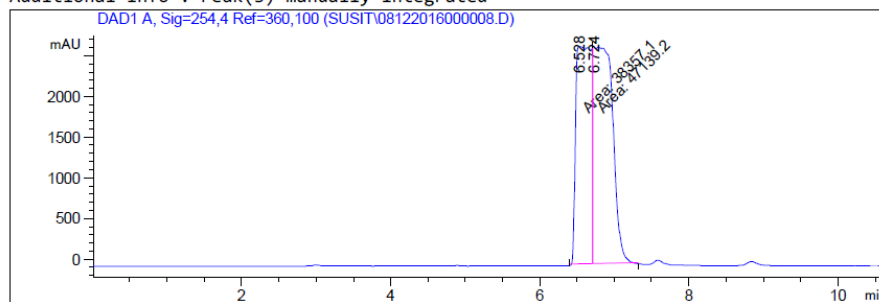

=====  
 Area Percent Report  
 =====

Sorted By : Signal  
 Multiplier : 1.0000  
 Dilution : 1.0000  
 Use Multiplier & Dilution Factor with ISTDs

Signal 1: DAD1 A, Sig=254,4 Ref=360,100

| Peak # | RetTime [min] | Type | Width [min] | Area [mAU*s] | Height [mAU] | Area %  |
|--------|---------------|------|-------------|--------------|--------------|---------|
| 1      | 6.528         | MF   | 0.2393      | 3.83571e4    | 2671.10107   | 44.8641 |
| 2      | 6.724         | FM   | 0.2951      | 4.71392e4    | 2662.14160   | 55.1359 |

Totals : 8.54964e4 5333.24268

Figure S44 Chiral HPLC of **4d**

Sample Info : RKJ-3  
 CHIRALPAK IA-3, 250 MM, IPA/HEXANE : 10:90, 1.0 ml/min flc

Additional Info : Peak(s) manually integrated

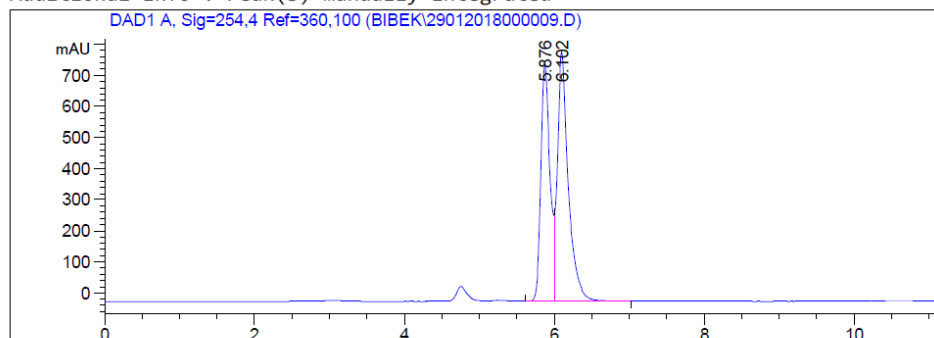

=====  
 Area Percent Report  
 =====

Sorted By : Signal  
 Multiplier : 1.0000  
 Dilution : 1.0000  
 Use Multiplier & Dilution Factor with ISTDs

Signal 1: DAD1 A, Sig=254,4 Ref=360,100

| Peak # | RetTime [min] | Type | Width [min] | Area [mAU*s] | Height [mAU] | Area %  |
|--------|---------------|------|-------------|--------------|--------------|---------|
| 1      | 5.876         | BV   | 0.1240      | 6263.58252   | 761.51666    | 43.3013 |
| 2      | 6.102         | VB   | 0.1454      | 8201.54199   | 801.19952    | 56.6987 |

Totals : 1.44651e4 1562.71619

Figure S45 Chiral HPLC of **4g**

Sample Info : R J 381  
 CHIRALPAK IA-3 250MM , 10 % iPrOH/HEXANE 1.0 ml/min flow rate, 254 nm

Additional Info : Peak(s) manually integrated

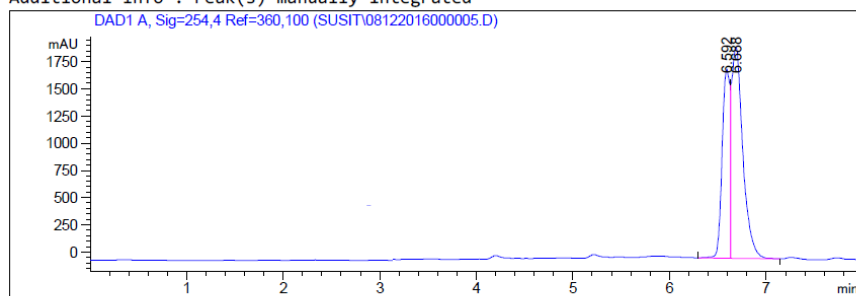

=====  
 Area Percent Report  
 =====

Sorted By : Signal  
 Multiplier : 1.0000  
 Dilution : 1.0000  
 Use Multiplier & Dilution Factor with ISTDs

Signal 1: DAD1 A, Sig=254,4 Ref=360,100

| Peak # | RetTime [min] | Type | Width [min] | Area [mAU*s] | Height [mAU] | Area %  |
|--------|---------------|------|-------------|--------------|--------------|---------|
| 1      | 6.592         | BV   | 0.0839      | 9504.08594   | 1736.27625   | 37.3413 |
| 2      | 6.688         | VB   | 0.1198      | 1.59478e4    | 1942.84363   | 62.6587 |

Totals : 2.54519e4 3679.11987

Figure S46 Chiral HPLC of **7a**

## DFT Study

Geometries in Cartesian coordinates (Angstroms), the structures of the following compounds:

### C1a [Ru(AMP)<sub>2</sub>(CH<sub>3</sub>CN)<sub>2</sub>][2BPh<sub>4</sub>]

|    |              |              |              |
|----|--------------|--------------|--------------|
| Ru | -0.070747000 | -0.233097000 | 0.138207000  |
| P  | 1.130728000  | 0.213420000  | -1.910342000 |
| C  | 1.520442000  | -1.459141000 | -4.151319000 |
| H  | 0.922273000  | -0.736128000 | -4.694810000 |
| C  | 2.596414000  | -2.202177000 | -2.118041000 |
| H  | 2.816504000  | -2.088917000 | -1.059851000 |
| C  | 3.754974000  | 0.933450000  | -2.732005000 |
| H  | 3.829313000  | -0.050619000 | -3.176087000 |
| C  | 3.175584000  | -3.265424000 | -2.812046000 |
| H  | 3.843742000  | -3.948194000 | -2.294020000 |
| C  | 2.589021000  | 1.330576000  | -2.049991000 |
| C  | 2.911800000  | -3.440879000 | -4.174425000 |
| H  | 3.362443000  | -4.268077000 | -4.714705000 |
| C  | 1.757258000  | -1.288755000 | -2.778751000 |
| C  | 4.768847000  | 3.096133000  | -2.322951000 |
| H  | 5.607652000  | 3.777003000  | -2.433130000 |
| C  | 2.540959000  | 2.626057000  | -1.508271000 |
| H  | 1.656632000  | 2.967697000  | -0.990164000 |
| C  | 4.833876000  | 1.810083000  | -2.861138000 |
| H  | 5.722487000  | 1.486203000  | -3.394672000 |
| C  | 1.596882000  | 1.871704000  | 2.769461000  |
| C  | -1.178606000 | 0.324377000  | -3.272388000 |
| C  | 2.083555000  | -2.536970000 | -4.840038000 |
| H  | 1.887750000  | -2.656327000 | -5.901449000 |
| C  | 3.615594000  | 3.503728000  | -1.648951000 |
| H  | 3.545888000  | 4.506917000  | -1.238478000 |
| H  | -1.489812000 | 0.778944000  | -4.214199000 |
| H  | -1.107157000 | -0.755856000 | -3.416503000 |
| H  | 1.948863000  | 2.906424000  | 2.788672000  |
| H  | 1.718214000  | 1.437915000  | 3.761847000  |
| N  | -2.076077000 | -0.208346000 | -0.957472000 |
| O  | 0.121024000  | 0.903381000  | -3.020279000 |
| C  | -2.198184000 | 0.673000000  | -2.192581000 |
| H  | -1.918946000 | 1.655453000  | -1.808798000 |
| C  | -3.659885000 | 0.795750000  | -2.732801000 |
| C  | -4.075202000 | -0.244489000 | -3.792140000 |
| C  | -3.877794000 | 2.215173000  | -3.291549000 |
| H  | -4.322723000 | 0.680567000  | -1.863261000 |
| H  | -3.915129000 | -1.276246000 | -3.475207000 |
| H  | -5.139419000 | -0.123102000 | -4.018260000 |
| H  | -3.533378000 | -0.095945000 | -4.733176000 |
| H  | -3.699502000 | 2.989659000  | -2.536224000 |
| H  | -3.217424000 | 2.419683000  | -4.143077000 |
| H  | -4.906566000 | 2.327916000  | -3.647130000 |

|   |              |              |              |
|---|--------------|--------------|--------------|
| C | -2.652537000 | -1.539590000 | -1.111170000 |
| O | -2.286249000 | -2.320945000 | -1.959007000 |
| O | -3.598268000 | -1.697769000 | -0.193917000 |
| C | -4.439781000 | -2.942486000 | -0.090404000 |
| C | -5.240928000 | -3.123852000 | -1.379127000 |
| C | -3.542604000 | -4.141803000 | 0.212907000  |
| C | -5.352910000 | -2.612671000 | 1.089178000  |
| H | -5.831798000 | -2.229482000 | -1.600520000 |
| H | -4.594234000 | -3.348976000 | -2.229333000 |
| H | -5.936577000 | -3.959597000 | -1.250832000 |
| H | -2.905872000 | -3.942297000 | 1.082064000  |
| H | -4.170214000 | -5.008055000 | 0.445863000  |
| H | -2.916812000 | -4.395790000 | -0.644418000 |
| H | -6.047683000 | -3.440261000 | 1.261033000  |
| H | -4.773065000 | -2.456289000 | 2.004807000  |
| H | -5.937482000 | -1.709722000 | 0.889764000  |
| H | -2.638489000 | 0.247898000  | -0.235448000 |
| C | -1.606993000 | -1.293446000 | 2.835716000  |
| N | -1.139571000 | -0.899379000 | 1.853837000  |
| C | -2.176179000 | -1.751903000 | 4.095506000  |
| H | -1.430618000 | -1.639671000 | 4.889581000  |
| H | -3.056708000 | -1.150033000 | 4.341779000  |
| H | -2.469536000 | -2.803855000 | 4.026428000  |
| C | 0.154653000  | -3.412015000 | -0.547759000 |
| N | 0.162890000  | -2.291894000 | -0.258255000 |
| C | 0.158973000  | -4.802272000 | -0.980944000 |
| H | 0.046281000  | -5.478386000 | -0.128128000 |
| H | -0.667551000 | -4.962252000 | -1.680602000 |
| H | 1.101314000  | -5.017822000 | -1.494991000 |
| N | 1.872800000  | -0.228491000 | 1.341821000  |
| P | -0.562708000 | 1.941023000  | 1.093483000  |
| C | -2.298600000 | 2.067594000  | 1.705692000  |
| C | -3.321171000 | 2.455491000  | 0.824277000  |
| C | -2.614766000 | 1.827530000  | 3.052433000  |
| C | -4.639752000 | 2.568731000  | 1.271385000  |
| H | -3.091072000 | 2.732227000  | -0.200989000 |
| C | -3.931722000 | 1.958052000  | 3.497815000  |
| H | -1.825395000 | 1.578271000  | 3.752413000  |
| C | -4.948453000 | 2.315857000  | 2.608766000  |
| H | -5.417321000 | 2.883294000  | 0.581482000  |
| H | -4.161305000 | 1.800696000  | 4.548284000  |
| H | -5.969743000 | 2.421974000  | 2.961955000  |
| C | -0.314254000 | 3.658846000  | 0.485455000  |
| C | -0.114197000 | 4.674313000  | 1.438304000  |
| C | -0.448613000 | 4.005084000  | -0.868338000 |
| C | -0.031469000 | 6.006838000  | 1.036445000  |
| H | -0.042871000 | 4.424458000  | 2.492320000  |
| C | -0.380034000 | 5.343191000  | -1.263245000 |
| H | -0.574997000 | 3.238813000  | -1.626839000 |

|   |              |              |              |
|---|--------------|--------------|--------------|
| C | -0.168151000 | 6.343741000  | -0.313148000 |
| H | 0.129008000  | 6.783338000  | 1.778440000  |
| H | -0.483899000 | 5.600382000  | -2.313189000 |
| H | -0.111429000 | 7.383201000  | -0.622071000 |
| C | 1.884219000  | -1.209150000 | 2.419984000  |
| O | 1.412620000  | -0.986017000 | 3.509969000  |
| O | 2.485655000  | -2.314359000 | 1.991153000  |
| C | 2.750050000  | -3.482142000 | 2.907971000  |
| C | 3.654011000  | -3.025003000 | 4.052937000  |
| C | 1.421444000  | -4.056229000 | 3.399524000  |
| C | 3.475802000  | -4.459477000 | 1.985106000  |
| H | 4.572985000  | -2.573603000 | 3.665015000  |
| H | 3.149602000  | -2.310946000 | 4.706538000  |
| H | 3.938028000  | -3.895745000 | 4.652873000  |
| H | 0.766450000  | -4.300740000 | 2.555792000  |
| H | 1.614667000  | -4.979957000 | 3.954606000  |
| H | 0.908143000  | -3.359231000 | 4.064173000  |
| H | 3.736100000  | -5.365685000 | 2.540170000  |
| H | 2.842878000  | -4.747507000 | 1.138895000  |
| H | 4.400334000  | -4.020479000 | 1.597744000  |
| H | 2.504329000  | -0.592336000 | 0.631452000  |
| C | 2.447115000  | 1.120222000  | 1.739010000  |
| H | 2.446242000  | 1.679082000  | 0.799943000  |
| O | 0.178263000  | 1.895470000  | 2.555621000  |
| C | 3.922828000  | 1.008311000  | 2.225358000  |
| C | 4.519260000  | 2.399077000  | 2.521482000  |
| C | 4.818906000  | 0.276014000  | 1.208424000  |
| H | 3.923591000  | 0.435914000  | 3.164044000  |
| H | 4.039198000  | 2.899922000  | 3.366974000  |
| H | 5.579605000  | 2.297505000  | 2.771653000  |
| H | 4.449553000  | 3.054807000  | 1.644764000  |
| H | 4.541849000  | -0.775259000 | 1.069704000  |
| H | 4.808681000  | 0.774059000  | 0.231528000  |
| H | 5.853910000  | 0.277191000  | 1.564185000  |

**C1b [Ru(AMP)<sub>2</sub>(CH<sub>3</sub>CN)<sub>2</sub>][2BPh<sub>4</sub>]**

|    |              |              |              |
|----|--------------|--------------|--------------|
| Ru | -0.026605000 | 0.238970000  | -0.033867000 |
| P  | -1.916686000 | 1.578132000  | 0.290005000  |
| P  | -0.943139000 | -1.902413000 | 0.531053000  |
| C  | -2.815334000 | -3.796193000 | -0.422477000 |
| H  | -3.285289000 | -3.725280000 | 0.551308000  |
| C  | -1.603809000 | 5.958734000  | -1.239084000 |
| H  | -1.562386000 | 6.979392000  | -1.607711000 |
| C  | -1.732210000 | 3.317169000  | -0.291939000 |
| C  | -1.093668000 | -3.141846000 | -2.000946000 |
| H  | -0.209432000 | -2.571192000 | -2.261062000 |
| C  | -3.243887000 | -1.510306000 | 2.126512000  |
| H  | -3.618660000 | -0.884172000 | 1.326173000  |

|   |              |              |              |
|---|--------------|--------------|--------------|
| C | -1.615886000 | -4.039347000 | -2.933619000 |
| H | -1.131284000 | -4.152092000 | -3.899677000 |
| C | -1.985144000 | -2.129116000 | 2.027401000  |
| C | -1.371152000 | 3.579686000  | -1.623673000 |
| H | -1.140629000 | 2.760670000  | -2.297859000 |
| C | -2.743703000 | -4.803243000 | -2.623178000 |
| H | -3.148777000 | -5.499001000 | -3.352079000 |
| C | -1.964221000 | 5.706475000  | 0.084841000  |
| H | -2.203400000 | 6.529764000  | 0.751430000  |
| C | -1.686851000 | -3.013649000 | -0.728730000 |
| C | -3.586544000 | -2.512739000 | 4.303739000  |
| H | -4.205992000 | -2.661659000 | 5.183139000  |
| C | -1.542614000 | -2.952001000 | 3.079276000  |
| H | -0.585159000 | -3.453625000 | 3.009879000  |
| C | -0.494050000 | 0.730492000  | 3.185992000  |
| C | -5.045551000 | -0.319991000 | -1.644477000 |
| H | -5.197467000 | -1.214064000 | -2.242193000 |
| C | -3.770187000 | -0.022660000 | -1.157407000 |
| H | -2.951146000 | -0.696697000 | -1.374940000 |
| C | -3.560004000 | 1.121733000  | -0.374220000 |
| C | -2.034841000 | 4.392884000  | 0.557127000  |
| H | -2.347621000 | 4.212068000  | 1.579803000  |
| C | -1.312053000 | 4.891236000  | -2.094820000 |
| H | -1.050252000 | 5.081857000  | -3.132031000 |
| C | -6.120325000 | 0.520165000  | -1.351397000 |
| H | -7.111808000 | 0.288331000  | -1.728863000 |
| C | -5.919652000 | 1.661243000  | -0.568809000 |
| H | -6.753749000 | 2.316468000  | -0.336461000 |
| C | -4.038106000 | -1.705638000 | 3.256657000  |
| H | -5.010829000 | -1.226659000 | 3.316154000  |
| C | -4.648601000 | 1.966734000  | -0.087408000 |
| H | -4.505903000 | 2.860167000  | 0.511292000  |
| C | -1.281290000 | 1.987940000  | 2.863206000  |
| C | 1.493192000  | -3.140410000 | 0.282222000  |
| C | -3.341076000 | -4.677802000 | -1.367984000 |
| H | -4.212602000 | -5.274570000 | -1.116026000 |
| C | -2.340168000 | -3.134536000 | 4.210879000  |
| H | -1.988287000 | -3.773803000 | 5.015239000  |
| H | 1.845786000  | -4.048026000 | 0.770638000  |
| H | 1.157386000  | -3.403011000 | -0.721861000 |
| H | -1.172749000 | -0.118550000 | 3.250825000  |
| H | -0.013619000 | 0.857559000  | 4.163271000  |
| H | -1.824389000 | 2.290498000  | 3.762193000  |
| H | -0.622783000 | 2.806006000  | 2.562417000  |
| N | 2.181486000  | -0.852325000 | -0.483880000 |
| O | 0.400195000  | -2.691901000 | 1.103882000  |
| C | 2.616716000  | -2.107808000 | 0.252888000  |
| H | 2.769015000  | -1.764711000 | 1.281815000  |
| C | 3.965800000  | -2.694231000 | -0.258714000 |

|   |              |              |              |
|---|--------------|--------------|--------------|
| C | 4.392074000  | -3.929790000 | 0.559862000  |
| C | 5.098404000  | -1.651862000 | -0.217975000 |
| H | 3.823558000  | -3.012870000 | -1.298609000 |
| H | 3.756473000  | -4.802064000 | 0.383646000  |
| H | 5.410387000  | -4.219841000 | 0.283446000  |
| H | 4.393432000  | -3.717829000 | 1.636770000  |
| H | 4.881228000  | -0.750061000 | -0.798280000 |
| H | 5.318825000  | -1.352343000 | 0.813652000  |
| H | 6.015684000  | -2.085373000 | -0.628776000 |
| C | 2.350962000  | -0.911191000 | -1.912576000 |
| O | 1.910222000  | -1.819549000 | -2.585057000 |
| O | 3.038278000  | 0.149986000  | -2.330490000 |
| C | 3.503815000  | 0.297271000  | -3.754009000 |
| C | 4.416921000  | -0.875163000 | -4.114220000 |
| C | 2.296769000  | 0.403405000  | -4.684925000 |
| C | 4.282081000  | 1.611301000  | -3.705248000 |
| H | 5.253527000  | -0.948719000 | -3.412151000 |
| H | 3.873691000  | -1.821937000 | -4.128118000 |
| H | 4.834232000  | -0.707297000 | -5.112410000 |
| H | 1.633033000  | 1.213059000  | -4.360974000 |
| H | 2.644939000  | 0.637356000  | -5.696331000 |
| H | 1.743283000  | -0.536821000 | -4.721271000 |
| H | 4.698298000  | 1.830720000  | -4.692980000 |
| H | 3.628327000  | 2.442905000  | -3.420257000 |
| H | 5.110245000  | 1.550567000  | -2.992549000 |
| H | 2.750404000  | -0.078663000 | -0.146372000 |
| N | 0.572132000  | 0.367341000  | 2.174943000  |
| O | -2.304691000 | 1.754962000  | 1.877861000  |
| C | 1.762748000  | 1.166503000  | 2.468256000  |
| O | 1.747948000  | 2.374029000  | 2.433769000  |
| O | 2.762515000  | 0.362883000  | 2.807534000  |
| C | 4.029331000  | 0.903667000  | 3.454575000  |
| C | 4.798729000  | 1.727261000  | 2.424564000  |
| C | 3.650654000  | 1.707580000  | 4.698300000  |
| C | 4.768323000  | -0.375702000 | 3.837640000  |
| H | 5.000231000  | 1.139269000  | 1.522605000  |
| H | 4.255322000  | 2.635010000  | 2.154204000  |
| H | 5.763259000  | 2.021930000  | 2.850598000  |
| H | 3.045120000  | 1.103465000  | 5.382369000  |
| H | 4.568238000  | 1.983982000  | 5.227574000  |
| H | 3.113776000  | 2.624927000  | 4.451241000  |
| H | 5.710293000  | -0.116922000 | 4.330545000  |
| H | 4.175112000  | -0.978346000 | 4.532040000  |
| H | 5.002463000  | -0.982048000 | 2.957927000  |
| H | 0.824305000  | -0.605695000 | 2.362231000  |
| C | 1.715252000  | 2.969789000  | -0.568999000 |
| N | 1.125012000  | 1.982838000  | -0.440041000 |
| C | 2.416101000  | 4.239089000  | -0.699030000 |
| H | 1.736882000  | 4.982744000  | -1.129029000 |



|   |              |              |              |
|---|--------------|--------------|--------------|
| H | 2.737437000  | 4.579233000  | 0.290713000  |
| H | 3.291630000  | 4.131769000  | -1.346602000 |
| C | -0.904990000 | 0.018361000  | -3.101630000 |
| N | -0.539273000 | 0.096705000  | -2.004813000 |
| C | -1.423812000 | -0.113166000 | -4.457157000 |
| H | -0.728915000 | 0.323093000  | -5.180399000 |
| H | -1.564907000 | -1.173677000 | -4.690913000 |
| H | -2.389856000 | 0.397165000  | -4.533228000 |

**C1c [Ru(AMP)<sub>2</sub>(CH<sub>3</sub>CN)<sub>2</sub>][2BPh<sub>4</sub>]**

|    |              |              |              |
|----|--------------|--------------|--------------|
| Ru | 0.058053000  | 0.220910000  | -0.206544000 |
| P  | -1.340089000 | 2.213826000  | 0.124899000  |
| C  | -0.786518000 | 5.947965000  | -2.565745000 |
| H  | -0.687529000 | 6.825642000  | -3.197411000 |
| C  | -1.053224000 | 3.683150000  | -0.934358000 |
| C  | -0.892005000 | 3.541971000  | -2.322192000 |
| H  | -0.874436000 | 2.554049000  | -2.773457000 |
| C  | -0.944366000 | 6.093673000  | -1.186134000 |
| H  | -0.969756000 | 7.084473000  | -0.742494000 |
| C  | 0.726456000  | 1.631788000  | 2.673283000  |
| C  | -5.227061000 | 1.917417000  | -1.188033000 |
| H  | -5.732436000 | 1.857971000  | -2.147817000 |
| C  | -3.833863000 | 1.943338000  | -1.138233000 |
| H  | -3.270041000 | 1.926471000  | -2.066379000 |
| C  | -3.170079000 | 2.057510000  | 0.094936000  |
| C  | -1.087584000 | 4.968750000  | -0.372260000 |
| H  | -1.244053000 | 5.092550000  | 0.694462000  |
| C  | -0.769172000 | 4.671197000  | -3.134126000 |
| H  | -0.668150000 | 4.556365000  | -4.210024000 |
| C  | -5.973239000 | 2.008214000  | -0.008719000 |
| H  | -7.058447000 | 2.012668000  | -0.050944000 |
| C  | -5.319250000 | 2.114526000  | 1.219510000  |
| H  | -5.893772000 | 2.201555000  | 2.137131000  |
| C  | -3.923147000 | 2.135083000  | 1.276309000  |
| H  | -3.425933000 | 2.259177000  | 2.231665000  |
| C  | 0.081524000  | 2.954481000  | 2.289175000  |
| C  | 0.298307000  | -2.896007000 | 1.838668000  |
| H  | 0.689191000  | -3.457967000 | 2.685421000  |
| H  | -0.262988000 | -3.576548000 | 1.197213000  |
| H  | -0.033085000 | 0.979981000  | 3.108460000  |
| H  | 1.483948000  | 1.817245000  | 3.445350000  |
| H  | -0.124000000 | 3.509611000  | 3.208306000  |
| H  | 0.741693000  | 3.557489000  | 1.661294000  |
| N  | 1.385912000  | 0.882198000  | 1.536628000  |
| O  | -1.200743000 | 2.784100000  | 1.668773000  |
| C  | 2.636814000  | 1.617369000  | 1.241432000  |
| O  | 2.633927000  | 2.653796000  | 0.621134000  |
| O  | 3.639464000  | 1.005039000  | 1.838421000  |

|   |              |              |              |
|---|--------------|--------------|--------------|
| C | 5.013326000  | 1.648305000  | 1.965658000  |
| C | 5.605968000  | 1.869010000  | 0.576363000  |
| C | 4.860930000  | 2.943681000  | 2.761051000  |
| C | 5.785806000  | 0.593771000  | 2.752667000  |
| H | 5.605265000  | 0.940688000  | -0.001814000 |
| H | 5.064744000  | 2.642487000  | 0.027887000  |
| H | 6.645176000  | 2.196285000  | 0.687774000  |
| H | 4.398449000  | 2.752981000  | 3.735565000  |
| H | 5.854902000  | 3.364258000  | 2.944662000  |
| H | 4.275615000  | 3.689447000  | 2.218601000  |
| H | 6.804528000  | 0.950054000  | 2.933425000  |
| H | 5.314621000  | 0.403511000  | 3.721982000  |
| H | 5.841842000  | -0.345256000 | 2.195796000  |
| H | 1.697121000  | -0.006529000 | 1.935472000  |
| C | 1.925105000  | 1.924424000  | -2.150516000 |
| N | 1.242671000  | 1.262980000  | -1.490501000 |
| C | 2.779903000  | 2.801784000  | -2.937882000 |
| H | 2.179411000  | 3.616313000  | -3.355959000 |
| H | 3.549144000  | 3.228855000  | -2.286495000 |
| H | 3.261136000  | 2.251148000  | -3.751915000 |
| C | -1.722063000 | -0.687764000 | -2.707058000 |
| N | -1.103150000 | -0.346912000 | -1.789407000 |
| C | -2.475827000 | -1.156896000 | -3.863457000 |
| H | -2.215759000 | -0.570343000 | -4.750551000 |
| H | -2.236033000 | -2.209472000 | -4.047544000 |
| H | -3.550076000 | -1.063332000 | -3.678699000 |
| N | -1.276630000 | -0.997426000 | 1.240873000  |
| P | 1.456744000  | -1.788272000 | -0.363699000 |
| C | -0.588085000 | -1.767502000 | 2.372482000  |
| H | 0.069907000  | -1.036054000 | 2.848598000  |
| O | 1.480938000  | -2.428043000 | 1.164176000  |
| C | 3.270545000  | -1.649126000 | -0.618716000 |
| C | 3.744275000  | -1.112582000 | -1.827377000 |
| C | 4.180963000  | -2.208263000 | 0.290155000  |
| C | 5.107212000  | -1.136672000 | -2.122926000 |
| H | 3.049676000  | -0.710238000 | -2.559300000 |
| C | 5.544590000  | -2.231310000 | -0.012413000 |
| H | 3.824463000  | -2.644230000 | 1.216122000  |
| C | 6.010448000  | -1.697908000 | -1.215880000 |
| H | 5.463600000  | -0.735522000 | -3.067392000 |
| H | 6.241114000  | -2.684257000 | 0.687455000  |
| H | 7.069713000  | -1.731048000 | -1.452933000 |
| C | 1.068724000  | -3.184906000 | -1.487870000 |
| C | 1.202587000  | -4.510183000 | -1.048775000 |
| C | 0.762382000  | -2.933164000 | -2.833528000 |
| C | 0.997550000  | -5.566725000 | -1.937013000 |
| H | 1.486309000  | -4.722030000 | -0.022862000 |
| C | 0.577214000  | -3.993113000 | -3.722592000 |
| H | 0.693069000  | -1.912454000 | -3.197708000 |

|   |              |              |              |
|---|--------------|--------------|--------------|
| C | 0.682023000  | -5.311489000 | -3.272805000 |
| H | 1.099002000  | -6.589828000 | -1.587360000 |
| H | 0.362452000  | -3.791812000 | -4.768675000 |
| H | 0.533932000  | -6.135742000 | -3.963943000 |
| C | -2.233637000 | -1.874302000 | 0.543191000  |
| O | -1.858217000 | -2.747532000 | -0.203177000 |
| O | -3.469500000 | -1.569131000 | 0.896697000  |
| C | -4.656299000 | -2.406836000 | 0.454314000  |
| C | -4.815217000 | -2.271012000 | -1.058215000 |
| C | -4.454734000 | -3.855291000 | 0.900083000  |
| C | -5.813868000 | -1.754719000 | 1.204410000  |
| H | -4.889549000 | -1.215155000 | -1.339708000 |
| H | -3.983550000 | -2.741992000 | -1.587054000 |
| H | -5.740529000 | -2.769377000 | -1.365278000 |
| H | -4.303162000 | -3.913680000 | 1.983182000  |
| H | -5.362731000 | -4.420895000 | 0.666670000  |
| H | -3.616554000 | -4.331791000 | 0.389156000  |
| H | -6.742781000 | -2.280681000 | 0.962983000  |
| H | -5.662441000 | -1.814202000 | 2.286658000  |
| H | -5.926023000 | -0.705317000 | 0.921424000  |
| H | -1.844266000 | -0.283712000 | 1.698259000  |
| C | -1.593015000 | -2.245716000 | 3.464442000  |
| C | -2.424242000 | -1.076067000 | 4.026170000  |
| C | -0.864944000 | -2.950128000 | 4.627797000  |
| H | -2.281267000 | -2.970290000 | 3.010073000  |
| H | -3.072608000 | -0.604721000 | 3.281254000  |
| H | -3.080263000 | -1.439630000 | 4.822846000  |
| H | -1.777502000 | -0.308456000 | 4.472353000  |
| H | -0.450651000 | -3.923053000 | 4.350276000  |
| H | -0.051225000 | -2.330816000 | 5.026499000  |
| H | -1.568417000 | -3.128287000 | 5.446409000  |

### **CH<sub>3</sub>CN**

|   |              |              |              |
|---|--------------|--------------|--------------|
| C | 0.000259000  | 0.017402000  | 1.180819000  |
| H | 0.078827000  | 1.046385000  | 1.545833000  |
| H | -0.925284000 | -0.420704000 | 1.567674000  |
| H | 0.847443000  | -0.556658000 | 1.569332000  |
| C | -0.000058000 | -0.004130000 | -0.280481000 |
| N | -0.000313000 | -0.021237000 | -1.440695000 |

### **Ligand (L) used for calculation [C<sub>7</sub>H<sub>16</sub>NO<sub>3</sub>P]**

|   |              |              |              |
|---|--------------|--------------|--------------|
| C | 0.741257000  | -1.240135000 | 0.288941000  |
| H | 0.788027000  | -2.316544000 | 0.492835000  |
| H | 0.769124000  | -0.697855000 | 1.241493000  |
| N | -0.555716000 | 0.517657000  | -0.862938000 |
| P | 3.352588000  | -0.804433000 | 0.175696000  |
| C | -0.529172000 | 1.529099000  | 0.056861000  |

|   |              |              |              |
|---|--------------|--------------|--------------|
| O | -0.768842000 | 1.431095000  | 1.249234000  |
| O | -0.222369000 | 2.704248000  | -0.560136000 |
| H | -0.109424000 | 0.742897000  | -1.741368000 |
| C | -0.543596000 | -0.901513000 | -0.478660000 |
| H | -0.502282000 | -1.448010000 | -1.429773000 |
| O | 1.842290000  | -0.858639000 | -0.549859000 |
| C | -1.844054000 | -1.324388000 | 0.251834000  |
| C | -1.831903000 | -2.817986000 | 0.619553000  |
| C | -3.076083000 | -1.005299000 | -0.608478000 |
| H | -1.907087000 | -0.737124000 | 1.173854000  |
| H | -1.074775000 | -3.062922000 | 1.371378000  |
| H | -2.803782000 | -3.110593000 | 1.032582000  |
| H | -1.647721000 | -3.445280000 | -0.263253000 |
| H | -3.116133000 | 0.053071000  | -0.879212000 |
| H | -3.071159000 | -1.591653000 | -1.537426000 |
| H | -3.994824000 | -1.253219000 | -0.065021000 |
| C | -0.218443000 | 3.848786000  | 0.301201000  |
| H | 0.046226000  | 4.692313000  | -0.338001000 |
| H | -1.204759000 | 4.003556000  | 0.747445000  |
| H | 0.516919000  | 3.730934000  | 1.101942000  |
| H | 3.974700000  | -1.945495000 | -0.433159000 |
| H | 3.941487000  | 0.083803000  | -0.770611000 |

#### **Reactant (2a)**

|    |              |              |              |
|----|--------------|--------------|--------------|
| C  | 1.725635000  | 0.519402000  | -0.311101000 |
| C  | -0.530637000 | 0.187212000  | 0.783255000  |
| C  | 0.493110000  | 0.945126000  | 0.008283000  |
| H  | 2.356203000  | 1.213639000  | -0.867926000 |
| C  | 2.364728000  | -0.804905000 | -0.002952000 |
| H  | 2.692383000  | -1.292183000 | -0.930889000 |
| H  | 3.263394000  | -0.667650000 | 0.613815000  |
| H  | 1.699160000  | -1.497400000 | 0.519621000  |
| H  | -0.154820000 | -0.744143000 | 1.204369000  |
| H  | 0.185238000  | 1.937411000  | -0.317767000 |
| Cl | -1.964347000 | -0.283766000 | -0.274541000 |
| H  | -0.964672000 | 0.793343000  | 1.581061000  |

#### **Product (4a)**

|   |             |              |              |
|---|-------------|--------------|--------------|
| C | 1.837177000 | -0.809798000 | -0.034402000 |
| C | 3.143298000 | 1.335416000  | -0.436544000 |
| C | 2.330894000 | 0.363413000  | -0.852923000 |
| C | 1.967063000 | -0.679968000 | 1.483780000  |
| H | 1.419337000 | 0.180030000  | 1.877572000  |
| H | 1.578496000 | -1.585324000 | 1.959293000  |
| H | 3.020673000 | -0.575060000 | 1.762670000  |
| H | 2.007001000 | 0.338366000  | -1.893265000 |
| O | 0.518101000 | -1.229363000 | -0.441492000 |

|   |              |              |              |
|---|--------------|--------------|--------------|
| C | -0.605352000 | -0.479732000 | -0.201133000 |
| C | -1.814469000 | -1.174624000 | -0.356750000 |
| C | -0.628509000 | 0.878320000  | 0.141272000  |
| C | -3.028335000 | -0.520893000 | -0.172086000 |
| H | -1.773401000 | -2.226209000 | -0.623725000 |
| C | -1.856721000 | 1.519832000  | 0.329169000  |
| H | 0.292124000  | 1.438858000  | 0.240619000  |
| C | -3.059368000 | 0.832961000  | 0.176282000  |
| H | -3.955881000 | -1.073767000 | -0.297410000 |
| H | -1.862225000 | 2.574116000  | 0.594668000  |
| H | -4.007341000 | 1.342205000  | 0.323952000  |
| H | 3.498740000  | 1.402844000  | 0.588327000  |
| H | 3.489743000  | 2.108043000  | -1.117354000 |
| H | 2.433853000  | -1.678770000 | -0.343391000 |

### **Intermediate (1)**

|    |              |              |              |
|----|--------------|--------------|--------------|
| Ru | 0.008595000  | -0.051571000 | -0.005162000 |
| P  | 0.461600000  | -1.230370000 | -1.916383000 |
| C  | -3.007038000 | -1.976039000 | 1.194180000  |
| C  | 2.999586000  | -1.807439000 | -1.322445000 |
| H  | 3.639987000  | -2.686915000 | -1.401221000 |
| H  | 3.370550000  | -1.041368000 | -2.005368000 |
| H  | -3.322694000 | -3.018472000 | 1.111984000  |
| H  | -3.713401000 | -1.437581000 | 1.824236000  |
| N  | 2.230048000  | -0.032287000 | 0.344400000  |
| O  | 1.704592000  | -2.273958000 | -1.765632000 |
| C  | 3.002812000  | -1.337473000 | 0.132629000  |
| H  | 2.420373000  | -2.065102000 | 0.707239000  |
| C  | 4.428275000  | -1.293739000 | 0.763925000  |
| C  | 5.524972000  | -0.682686000 | -0.128474000 |
| C  | 4.837509000  | -2.706216000 | 1.223619000  |
| H  | 4.342892000  | -0.673510000 | 1.668926000  |
| H  | 5.296381000  | 0.329422000  | -0.474009000 |
| H  | 6.460227000  | -0.629997000 | 0.436683000  |
| H  | 5.718799000  | -1.300443000 | -1.012338000 |
| H  | 4.111060000  | -3.136290000 | 1.922866000  |
| H  | 4.948744000  | -3.396463000 | 0.379641000  |
| H  | 5.803636000  | -2.665374000 | 1.735038000  |
| C  | 2.823618000  | 1.126916000  | -0.303926000 |
| O  | 2.966753000  | 1.218141000  | -1.498942000 |
| O  | 3.145014000  | 2.028758000  | 0.616817000  |
| H  | 2.267545000  | 0.156325000  | 1.347703000  |
| C  | -0.440023000 | 1.534912000  | 2.875612000  |
| N  | -0.198785000 | 1.040453000  | 1.855881000  |
| C  | -0.781578000 | 2.148342000  | 4.151717000  |
| H  | -1.871649000 | 2.161728000  | 4.258025000  |
| H  | -0.350919000 | 1.570104000  | 4.975607000  |
| H  | -0.399317000 | 3.173030000  | 4.196733000  |

|   |              |              |              |
|---|--------------|--------------|--------------|
| C | 0.073705000  | 2.707907000  | -1.843386000 |
| N | 0.044700000  | 1.781256000  | -1.148727000 |
| C | 0.130045000  | 3.863555000  | -2.730294000 |
| H | 0.026959000  | 4.789197000  | -2.155073000 |
| H | 1.089395000  | 3.873448000  | -3.258505000 |
| H | -0.678576000 | 3.811976000  | -3.466765000 |
| N | -2.245542000 | -0.048451000 | -0.307105000 |
| P | -0.305934000 | -1.955176000 | 1.244675000  |
| C | -2.899574000 | 1.015038000  | 0.438328000  |
| O | -3.225285000 | 0.924882000  | 1.594920000  |
| O | -3.068960000 | 2.069236000  | -0.359507000 |
| C | -3.744300000 | 3.212598000  | 0.234072000  |
| H | -2.287223000 | 0.236142000  | -1.285033000 |
| C | -2.968649000 | -1.387104000 | -0.223915000 |
| H | -2.368804000 | -2.044299000 | -0.865343000 |
| O | -1.769322000 | -1.964137000 | 1.937153000  |
| C | -4.397694000 | -1.309318000 | -0.835799000 |
| C | -5.102148000 | -2.680305000 | -0.791735000 |
| C | -4.370642000 | -0.785824000 | -2.284336000 |
| H | -4.983299000 | -0.609937000 | -0.222027000 |
| H | -5.314021000 | -3.017872000 | 0.226488000  |
| H | -6.062209000 | -2.614707000 | -1.311672000 |
| H | -4.508861000 | -3.452944000 | -1.296910000 |
| H | -4.031976000 | 0.254085000  | -2.366588000 |
| H | -3.741448000 | -1.416327000 | -2.926405000 |
| H | -5.380300000 | -0.809408000 | -2.704422000 |
| H | -0.481526000 | -2.130607000 | -2.452991000 |
| H | 0.747667000  | -0.446396000 | -3.058727000 |
| H | -0.127045000 | -3.228871000 | 0.647349000  |
| H | 0.474320000  | -2.127100000 | 2.405343000  |
| H | -3.115411000 | 3.651469000  | 1.011241000  |
| H | -3.893714000 | 3.911763000  | -0.586575000 |
| H | -4.699424000 | 2.900566000  | 0.658802000  |
| C | 3.773901000  | 3.249097000  | 0.136585000  |
| H | 3.988939000  | 3.827853000  | 1.032596000  |
| H | 4.691665000  | 3.005419000  | -0.401049000 |
| H | 3.087584000  | 3.786256000  | -0.520495000 |

### **Intermediate (2)**

|   |              |              |              |
|---|--------------|--------------|--------------|
| C | 1.902707000  | -0.220498000 | 2.152902000  |
| H | 2.732594000  | 0.141984000  | 2.758436000  |
| H | 1.806469000  | -1.298828000 | 2.291510000  |
| N | 1.057101000  | -0.309873000 | -0.256465000 |
| P | -0.339607000 | 1.308247000  | 1.982334000  |
| C | 0.885381000  | -1.774565000 | -0.295179000 |
| O | 0.322353000  | -2.359147000 | 0.599994000  |
| O | 1.390921000  | -2.262514000 | -1.405699000 |
| H | 1.363292000  | -0.022764000 | -1.189827000 |

|    |              |              |              |
|----|--------------|--------------|--------------|
| C  | 2.177127000  | 0.152980000  | 0.694334000  |
| H  | 2.166469000  | 1.244555000  | 0.586335000  |
| O  | 0.716735000  | 0.365019000  | 2.752087000  |
| C  | 3.568739000  | -0.355446000 | 0.203608000  |
| C  | 4.698587000  | 0.122035000  | 1.140894000  |
| C  | 3.865395000  | 0.111654000  | -1.235394000 |
| H  | 3.557346000  | -1.454391000 | 0.221635000  |
| H  | 4.675380000  | -0.357917000 | 2.123212000  |
| H  | 5.665438000  | -0.125126000 | 0.692742000  |
| H  | 4.674058000  | 1.210126000  | 1.282785000  |
| H  | 3.180618000  | -0.298029000 | -1.987461000 |
| H  | 3.858014000  | 1.207500000  | -1.305224000 |
| H  | 4.865145000  | -0.221246000 | -1.529691000 |
| C  | -3.157193000 | -1.359006000 | -1.166884000 |
| C  | -2.798694000 | -1.178642000 | 0.277785000  |
| H  | -3.170696000 | -2.404269000 | -1.477977000 |
| H  | -4.083517000 | -0.863989000 | -1.458436000 |
| Ru | -0.900030000 | 0.510884000  | -0.066144000 |
| C  | -3.613693000 | -0.514692000 | 1.145377000  |
| Cl | -1.836012000 | -0.574827000 | -2.248090000 |
| C  | 1.287043000  | -3.713021000 | -1.612762000 |
| H  | 1.782089000  | -3.888870000 | -2.565225000 |
| H  | 1.793562000  | -4.230449000 | -0.797070000 |
| H  | 0.233912000  | -3.994267000 | -1.654042000 |
| H  | -1.342249000 | 1.390817000  | 2.965053000  |
| H  | 0.181875000  | 2.623689000  | 1.995810000  |
| H  | -2.018912000 | -1.833801000 | 0.680387000  |
| N  | -0.256960000 | 2.178331000  | -0.977836000 |
| C  | -0.021289000 | 3.154176000  | -1.560721000 |
| C  | 0.251143000  | 4.380703000  | -2.298263000 |
| H  | 1.186718000  | 4.832397000  | -1.950850000 |
| H  | 0.334641000  | 4.160356000  | -3.368420000 |
| H  | -0.567465000 | 5.093152000  | -2.144662000 |
| C  | -3.528824000 | -0.563990000 | 2.633244000  |
| H  | -3.610364000 | 0.435257000  | 3.079391000  |
| H  | -4.402492000 | -1.118572000 | 3.007182000  |
| H  | -2.629850000 | -1.069546000 | 2.997649000  |
| H  | -4.464096000 | 0.035497000  | 0.735045000  |

### **Intermediate (3)**

|   |              |              |              |
|---|--------------|--------------|--------------|
| C | 1.997669000  | 0.727391000  | 1.936464000  |
| H | 2.009983000  | 1.736029000  | 2.370768000  |
| H | 2.910899000  | 0.208191000  | 2.230561000  |
| N | 1.306000000  | -0.271704000 | -0.287997000 |
| P | -0.649625000 | 0.106435000  | 2.189391000  |
| C | 1.905408000  | -1.539246000 | -0.147315000 |
| O | 2.618043000  | -1.871316000 | 0.780468000  |
| O | 1.584786000  | -2.327084000 | -1.185514000 |

|    |              |              |              |
|----|--------------|--------------|--------------|
| H  | 1.059816000  | -0.089743000 | -1.266809000 |
| C  | 1.957851000  | 0.877307000  | 0.388673000  |
| H  | 1.310491000  | 1.723812000  | 0.137801000  |
| O  | 0.958189000  | -0.021665000 | 2.569836000  |
| C  | 3.378005000  | 1.194069000  | -0.159057000 |
| C  | 3.962715000  | 2.455219000  | 0.504844000  |
| C  | 3.371121000  | 1.366142000  | -1.687747000 |
| H  | 4.025828000  | 0.343319000  | 0.092193000  |
| H  | 4.119897000  | 2.334179000  | 1.581758000  |
| H  | 4.934618000  | 2.698764000  | 0.060294000  |
| H  | 3.305301000  | 3.322908000  | 0.353328000  |
| H  | 3.045360000  | 0.462281000  | -2.213402000 |
| H  | 2.709117000  | 2.187933000  | -1.993245000 |
| H  | 4.379950000  | 1.603351000  | -2.045482000 |
| Cl | -1.055309000 | -0.328387000 | -2.504776000 |
| C  | 2.071366000  | -3.677666000 | -1.120826000 |
| H  | 1.712903000  | -4.150665000 | -2.035180000 |
| H  | 3.164030000  | -3.690959000 | -1.079330000 |
| H  | 1.668258000  | -4.185701000 | -0.240553000 |
| H  | -1.101719000 | -0.735517000 | 3.235205000  |
| H  | -0.983875000 | 1.361823000  | 2.784663000  |
| N  | -1.190260000 | 1.839994000  | -0.320959000 |
| C  | -1.366614000 | 2.923490000  | -0.698143000 |
| C  | -1.624616000 | 4.254369000  | -1.237694000 |
| H  | -0.797399000 | 4.934641000  | -1.008823000 |
| H  | -1.736579000 | 4.189116000  | -2.325541000 |
| H  | -2.545924000 | 4.667684000  | -0.813178000 |
| C  | -1.542420000 | -2.400648000 | 0.017580000  |
| C  | -3.266838000 | -0.612620000 | -0.037764000 |
| C  | -2.606522000 | -1.690748000 | 0.624790000  |
| H  | -0.977702000 | -3.097300000 | 0.634987000  |
| H  | -1.547074000 | -2.610708000 | -1.048374000 |
| H  | -3.411394000 | -0.697005000 | -1.114382000 |
| Ru | -1.108530000 | -0.224326000 | 0.039003000  |
| C  | -4.300697000 | 0.223288000  | 0.679667000  |
| H  | -5.308210000 | -0.206402000 | 0.568203000  |
| H  | -4.089028000 | 0.300519000  | 1.754132000  |
| H  | -4.338828000 | 1.240247000  | 0.271992000  |
| H  | -2.775666000 | -1.814002000 | 1.696128000  |

#### **Intermediate (4)**

|   |              |              |              |
|---|--------------|--------------|--------------|
| C | -2.864595000 | 0.469717000  | -1.683137000 |
| H | -2.736011000 | 0.688860000  | -2.751735000 |
| H | -3.870117000 | 0.768257000  | -1.385272000 |
| N | -1.410998000 | 0.687192000  | 0.375837000  |
| P | -1.490967000 | -1.872235000 | -1.515515000 |
| C | -2.401101000 | 0.499608000  | 1.354333000  |
| O | -3.593240000 | 0.424146000  | 1.134697000  |



|    |              |              |              |
|----|--------------|--------------|--------------|
| O  | -1.844980000 | 0.430842000  | 2.578268000  |
| H  | -0.526210000 | 1.018409000  | 0.787284000  |
| C  | -1.823689000 | 1.323791000  | -0.896063000 |
| H  | -0.898148000 | 1.372034000  | -1.478133000 |
| O  | -2.862065000 | -0.946669000 | -1.504428000 |
| C  | -2.347660000 | 2.776973000  | -0.726838000 |
| C  | -2.649148000 | 3.422635000  | -2.091390000 |
| C  | -1.353853000 | 3.649562000  | 0.055922000  |
| H  | -3.284375000 | 2.723373000  | -0.157023000 |
| H  | -3.443650000 | 2.905291000  | -2.638583000 |
| H  | -2.971281000 | 4.460974000  | -1.955061000 |
| H  | -1.753977000 | 3.437758000  | -2.727873000 |
| H  | -1.190111000 | 3.280998000  | 1.073847000  |
| H  | -0.378617000 | 3.693300000  | -0.446552000 |
| H  | -1.731272000 | 4.675180000  | 0.137252000  |
| C  | -2.765164000 | 0.182949000  | 3.650527000  |
| H  | -2.155890000 | 0.170535000  | 4.554260000  |
| H  | -3.518553000 | 0.973507000  | 3.703426000  |
| H  | -3.266291000 | -0.779047000 | 3.513019000  |
| H  | -2.167522000 | -3.117439000 | -1.459762000 |
| H  | -1.152292000 | -1.895337000 | -2.903136000 |
| N  | 1.121640000  | -0.163262000 | -1.540963000 |
| C  | 1.951719000  | 0.443177000  | -2.079885000 |
| C  | 3.038650000  | 1.203579000  | -2.684442000 |
| H  | 2.646274000  | 2.034589000  | -3.279293000 |
| H  | 3.675121000  | 1.599125000  | -1.883562000 |
| H  | 3.639374000  | 0.557996000  | -3.333442000 |
| C  | -0.446713000 | -2.362134000 | 1.751787000  |
| C  | 1.376679000  | -2.916285000 | 0.177955000  |
| C  | 0.106869000  | -3.208140000 | 0.764180000  |
| H  | -1.475168000 | -2.532734000 | 2.062331000  |
| H  | 0.187956000  | -1.855206000 | 2.473764000  |
| H  | 2.133301000  | -2.509822000 | 0.847057000  |
| Ru | 0.041221000  | -1.201458000 | -0.060400000 |
| C  | 1.921327000  | -3.738973000 | -0.965578000 |
| H  | 2.491336000  | -4.607303000 | -0.602428000 |
| H  | 1.117945000  | -4.115931000 | -1.610871000 |
| H  | 2.598560000  | -3.145793000 | -1.590182000 |
| H  | -0.530715000 | -3.954007000 | 0.287560000  |
| O  | 1.177053000  | 0.096208000  | 1.300767000  |
| C  | 2.321243000  | 0.729234000  | 1.099412000  |
| C  | 2.366466000  | 2.149206000  | 1.120446000  |
| C  | 3.554842000  | 0.062544000  | 0.873806000  |
| C  | 3.555266000  | 2.848488000  | 0.923810000  |
| H  | 1.440996000  | 2.686446000  | 1.315243000  |
| C  | 4.738871000  | 0.770377000  | 0.674785000  |
| H  | 3.566402000  | -1.022534000 | 0.862405000  |
| C  | 4.756902000  | 2.170349000  | 0.687943000  |
| H  | 3.544244000  | 3.936622000  | 0.955725000  |

|   |             |             |             |
|---|-------------|-------------|-------------|
| H | 5.664073000 | 0.219747000 | 0.512581000 |
| H | 5.685323000 | 2.716179000 | 0.543486000 |

**TS1**

|    |              |              |              |
|----|--------------|--------------|--------------|
| C  | 2.184729000  | 0.101152000  | 1.886485000  |
| H  | 3.133570000  | 0.431925000  | 2.302933000  |
| H  | 1.966905000  | -0.897951000 | 2.276575000  |
| N  | 1.002550000  | -0.436266000 | -0.302559000 |
| P  | -0.357376000 | 0.871017000  | 2.161226000  |
| C  | 0.753760000  | -1.853808000 | 0.008204000  |
| O  | 0.178306000  | -2.164989000 | 1.029610000  |
| O  | 1.186633000  | -2.633276000 | -0.952740000 |
| H  | 1.174708000  | -0.372740000 | -1.310229000 |
| C  | 2.272780000  | 0.140577000  | 0.359309000  |
| H  | 2.264617000  | 1.189163000  | 0.046861000  |
| O  | 1.231408000  | 1.055578000  | 2.412877000  |
| C  | 3.558227000  | -0.532848000 | -0.209369000 |
| C  | 4.823946000  | 0.095853000  | 0.412439000  |
| C  | 3.629874000  | -0.409813000 | -1.744727000 |
| H  | 3.543076000  | -1.598762000 | 0.057325000  |
| H  | 4.950404000  | -0.144364000 | 1.471872000  |
| H  | 5.708089000  | -0.288902000 | -0.104309000 |
| H  | 4.829359000  | 1.187478000  | 0.299969000  |
| H  | 2.834876000  | -0.949403000 | -2.273030000 |
| H  | 3.615786000  | 0.642264000  | -2.058957000 |
| H  | 4.570213000  | -0.838604000 | -2.103574000 |
| C  | -3.250467000 | -0.851506000 | -1.618345000 |
| C  | -2.968695000 | -1.097519000 | -0.166843000 |
| H  | -3.426220000 | -1.767795000 | -2.183243000 |
| H  | -4.053394000 | -0.136336000 | -1.797117000 |
| Ru | -0.890707000 | 0.486329000  | -0.008818000 |
| C  | -3.665708000 | -0.487566000 | 0.831839000  |
| Cl | -1.741340000 | -0.087981000 | -2.427701000 |
| C  | 1.003388000  | -4.082997000 | -0.788632000 |
| H  | 1.442166000  | -4.515451000 | -1.685011000 |
| H  | 1.525946000  | -4.410533000 | 0.110939000  |
| H  | -0.062297000 | -4.305257000 | -0.719414000 |
| H  | -0.798448000 | -0.121888000 | 3.064337000  |
| H  | -0.828100000 | 2.056851000  | 2.754197000  |
| H  | -2.352900000 | -1.966811000 | 0.076177000  |
| N  | -0.170055000 | 2.268099000  | -0.573297000 |
| C  | 0.114421000  | 3.331124000  | -0.941813000 |
| C  | 0.457496000  | 4.668242000  | -1.407276000 |
| H  | 1.299525000  | 5.064460000  | -0.829149000 |
| H  | 0.732771000  | 4.635089000  | -2.467360000 |
| H  | -0.403938000 | 5.334599000  | -1.284768000 |
| C  | -3.678298000 | -0.908769000 | 2.265436000  |
| H  | -3.592397000 | -0.052867000 | 2.946024000  |

|   |              |              |             |
|---|--------------|--------------|-------------|
| H | -4.659805000 | -1.355504000 | 2.482648000 |
| H | -2.912653000 | -1.654492000 | 2.498179000 |
| H | -4.358310000 | 0.313710000  | 0.561389000 |
